1           **Local cortical desynchronization and pupil-linked arousal**  
2           **differentially shape brain states for optimal sensory**  
3           **performance**

4

5

6                           Leonhard Waschke\*, Sarah Tune, & Jonas Obleser\*  
7                           University of Lübeck, Germany

8

9

10    \*Author correspondence:  
11    Leonhard Waschke, Jonas Obleser  
12    Department of Psychology  
13    University of Lübeck  
14    Maria-Goeppert Straße 9a  
15    23562 Lübeck  
16    Email: leonhard.waschke@uni-luebeck.de, jonas.obleser@uni-luebeck.de

17

18    36 pages, 6 figures, 0 Tables, Supplemental information (7 figures, 12 tables)

19

20    **Keywords:** Arousal, Desynchronization, Perceptual decision-making, Noradrenaline,  
21    Entropy, EEG

22

23    **Conflict of interest:** The authors declare no competing financial interests.

24    **Author contributions:** LW and JO designed research. LW recorded data. LW analysed  
25    data with contributions from JO and ST. LW, ST, and JO wrote the manuscript.

26    **Acknowledgments:** Research was supported by the European Research Council (ERC  
27    Consolidator grant 646696 to JO) and a G.A. Lienert foundation scholarship (LW).  
28    Franziska Scharata, Philipp Seidel, and Simon Grosnick helped acquire the data. We  
29    thank Hong-Viet V. Ngo for assistance with illustrations, Björn Herrmann for help with  
30    source projection, and Santiago Jaramillo for insightful comments on an earlier version  
31    of this manuscript. We additionally would like to thank Jan Willem de Gee, Jonathan  
32    Pelle, and an anonymous reviewer for constructive feedback.

33

34

35 **Abstract**

36 Instantaneous brain states have consequences for our sensation, perception, and  
37 behaviour. Fluctuations in arousal and neural desynchronization likely pose  
38 perceptually relevant states. However, their relationship and their relative impact on  
39 perception is unclear. We here show that, at the single-trial level in humans, local  
40 desynchronization in sensory cortex (expressed as time-series entropy) versus pupil-  
41 linked arousal differentially impact perceptual processing. While we recorded  
42 electroencephalography (EEG) and pupillometry data, stimuli of a demanding auditory  
43 discrimination task were presented into states of high or low desynchronization of  
44 auditory cortex via a real-time closed-loop setup. Desynchronization and arousal  
45 distinctly influenced stimulus-evoked activity and shaped behaviour displaying an  
46 inverted u-shaped relationship: States of intermediate desynchronization elicited  
47 minimal response bias and fastest responses, while states of intermediate arousal gave  
48 rise to highest response sensitivity. Our results speak to a model in which independent  
49 states of local desynchronization and global arousal jointly optimise sensory processing  
50 and performance.

## 51 **Introduction**

52 The way we sense and perceive our environment is not determined by physical input  
53 through the senses alone. The dynamics of ongoing brain activity affect the build-up  
54 of sensory representations and our conscious perception of the physical world.  
55 Recently, instantaneous fluctuations of both pupil-linked arousal (McGinley et al.,  
56 2015b; Lee et al., 2018; Pfeffer et al., 2018) and neural desynchronization (Curto et al.,  
57 2009; Marguet and Harris, 2011; Pachitariu et al., 2015) have been highlighted as  
58 sources of such sensory and perceptual variation: Arousal and cortical  
59 desynchronization are two ways of characterizing the brain state, which strongly  
60 influences sensory cortical responses, the encoding of information, thus perception  
61 and ultimately behaviour.

62 The term arousal here and henceforth is used to refer to the general level of  
63 alertness which likely traces back to neuromodulatory activity and is associated with  
64 the ascending reticular activating system (ARAS). Pupil-linked arousal, which captures  
65 locus coeruleus-norepinephrine activity (LC-NE; Aston-Jones & Cohen, 2005; Joshi, Li,  
66 Kalwani, & Gold, 2016; Reimer et al., 2016) has been shown to influence sensory evoked  
67 activity (McGinley et al., 2015a, 2015b; Gelbard-Sagiv et al., 2018) and the processing  
68 of task-relevant information (Murphy et al., 2014; Lee et al., 2018). Despite evidence for  
69 an inverted u-shaped relation of tonic LC-NE activity to performance long suspected  
70 from the Yerkes-Dodson law (Yerkes and Dodson, 1908), the precise associations  
71 between arousal, sensory processing, and behaviour are underspecified: Although  
72 optimal performance at intermediate levels of arousal has reliably been observed  
73 (Murphy et al., 2014; McGinley et al., 2015b, 2015a; van den Brink et al., 2016; Faller et  
74 al., 2019), reports of linear effects on performance (Gelbard-Sagiv et al., 2018) or  
75 evoked activity (Neske and McCormick, 2018) in different tasks and species complicate  
76 this picture.

77 In a separate line of experimental work in non-human animals, relatively high neural  
78 desynchronization yielded improved encoding and representation of visual (Goard  
79 and Dan, 2009; Pinto et al., 2013; Beaman et al., 2017) as well as auditory input (Marguet  
80 and Harris, 2011; Pachitariu et al., 2015; Sakata, 2016). Such periods of  
81 desynchronization are characterized by reduced noise correlations in population  
82 activity, and these patterns are commonly referred to as desynchronized cortical  
83 states. They likely result from subtle changes in the balance of excitatory and inhibitory  
84 activity (Renart et al., 2010; Haider et al., 2012). Notably, behaviourally relevant changes  
85 in cortical desynchronization have been suggested to trace back to attention-related  
86 changes in thalamo-cortical interactions (Harris and Thiele, 2011). Thus, such  
87 desynchronization states can be expected to be of local nature and be limited to  
88 sensory cortical areas of the currently attended sensory domain (Beaman et al., 2017).  
89 Although local desynchronization and perceptual performance are positively linked in  
90 general (Beaman et al., 2017; Speed et al., 2019), the exact shape of their relationship  
91 (e.g., linear vs. quadratic) is unclear. Most notably, evidence for a similar mechanism in  
92 humans has remained elusive.

93 On the one hand, a tight link of pupil size and desynchronization has been claimed  
94 (McCormick, 1989; McCormick et al., 1991; McGinley et al., 2015a; Vinck et al., 2015). On  
95 the other hand, both measures have also been found to be locally unrelated (Beaman  
96 et al., 2017; Okun et al., 2019). As of now, pupil-linked arousal and local cortical  
97 desynchronization may or may not be distinct signatures of the same underlying

98 process: Varying noradrenergic and cholinergic activity could influence both, local  
99 cortical activity and the more global measure of pupil size via afferent projections from  
100 brain-stem nuclei (Harris and Thiele, 2011). In sum, it is, first, unclear how pupil-linked  
101 arousal and local cortical desynchronization precisely shape sensory processing and  
102 perceptual performance in humans. Second, the interrelation of both measures and  
103 their potentially shared underlying formative process lacks specification.

104 Here, we set out to test the relationship of local desynchronization states and  
105 pupil-linked arousal, and to specify their relative impact on sensory processing and  
106 perception in healthy human participants. We recorded EEG and pupillometry while  
107 participants performed a challenging auditory discrimination task. We modelled  
108 ongoing neural activity, sensory processing, and perceptual performance based on  
109 both local cortical desynchronization and pupil-linked arousal. This way we were able  
110 to test the interrelations of both measures but also to directly inspect their shared as  
111 well as exclusive influence on sensory processing and behaviour. Specifically, the effects  
112 of local cortical desynchronization and pupil-linked arousal on perceptual sensitivity as  
113 well as response criterion were analysed.

114 A closed-loop real-time algorithm calculated on-line an information theoretic  
115 proxy of auditory cortical desynchronization (weighted permutation entropy, WPE;  
116 Fadlallah, Chen, Keil, & Príncipe, 2013; Waschke, Wöstmann, & Obleser, 2017) based on  
117 EEG signal arising predominantly from auditory cortices. Of note, WPE as a proxy of  
118 desynchronization is tailored to the analysis of electrophysiological time series: It  
119 captures oscillatory as well as non-oscillatory contributions as a time-resolved estimate  
120 of desynchronization (see methods for details). Importantly, EEG entropy calculated for  
121 a previously published data set (Sarasso et al., 2015) aptly tracks changes in excitatory  
122 and inhibitory (E/I) cortical activity that occur under different anaesthetics (Fig. 2  
123 supplement 1). Also, EEG entropy as measured in the present data aligns closely with  
124 the spectral exponent, a previously suggested measure of E/I (Fig. 2 supplement 1; Gao,  
125 Peterson, & Voytek, 2017; Waschke et al., 2017). Entropy of EEG signals thus is not only  
126 sensitive to the basic features of desynchronization (e.g. reduced oscillatory power) but  
127 also captures changes in a central underlying mechanism (E/I balance).

128 We used this measure of ongoing desynchronization to trigger stimulus  
129 presentation during relatively synchronized and desynchronized states, respectively. A  
130 continuously adapting criterion enabled us to effectively sample the whole  
131 desynchronization state space (Jazayeri and Afraz, 2017). Such a closed-loop set up  
132 allows for selective stimulation during specific states of brain activity while accounting  
133 for changes in the appearance of those states and hence represents a powerful tool with  
134 a multitude of potential applications in research but also therapy (Sitaram et al., 2016;  
135 Ezzyat et al., 2018). To evaluate the interrelation of pre-stimulus desynchronization with  
136 simultaneously acquired pupil-linked arousal as well as their influence on stimulus-  
137 related activity we employed linear mixed-effect models. Furthermore, psychophysical  
138 models were used to evaluate the impact of desynchronization and arousal on  
139 perceptual sensitivity, response criterion, and response speed.

140 Although local cortical desynchronization and pupil-linked arousal were weakly  
141 positively correlated, both did not only shape the ongoing EEG activity into distinct  
142 states, but also differentially influenced sensory processing at the level of single trials:  
143 On the one hand, phase-locked activity in low frequencies as well as stimulus-related  
144 gamma power over auditory cortices was highest following intermediate levels of pre-

145 stimulus desynchronization. On the other hand, induced low-frequency power during  
146 and after a stimulus increased linearly with pre-stimulus arousal. Response criterion and  
147 speed exhibited an inverted u-shaped relationship with local cortical  
148 desynchronization, where intermediate desynchronization corresponded to minimal  
149 response bias and fastest responses. An analogous relationship was found for arousal  
150 and sensitivity, revealing highest sensitivity at intermediate arousal levels.

151 Our results speak to a model in which global arousal states and local  
152 desynchronization states jointly influence sensory processing and performance. While  
153 fluctuations in arousal are likely realized by afferent cholinergic and noradrenergic  
154 projections into sensory cortical areas (Robbins, 1997; Carter et al., 2010),  
155 desynchronization states might result from efferent feedback connections (Harris and  
156 Thiele, 2011; Zagha et al., 2013).

157

158

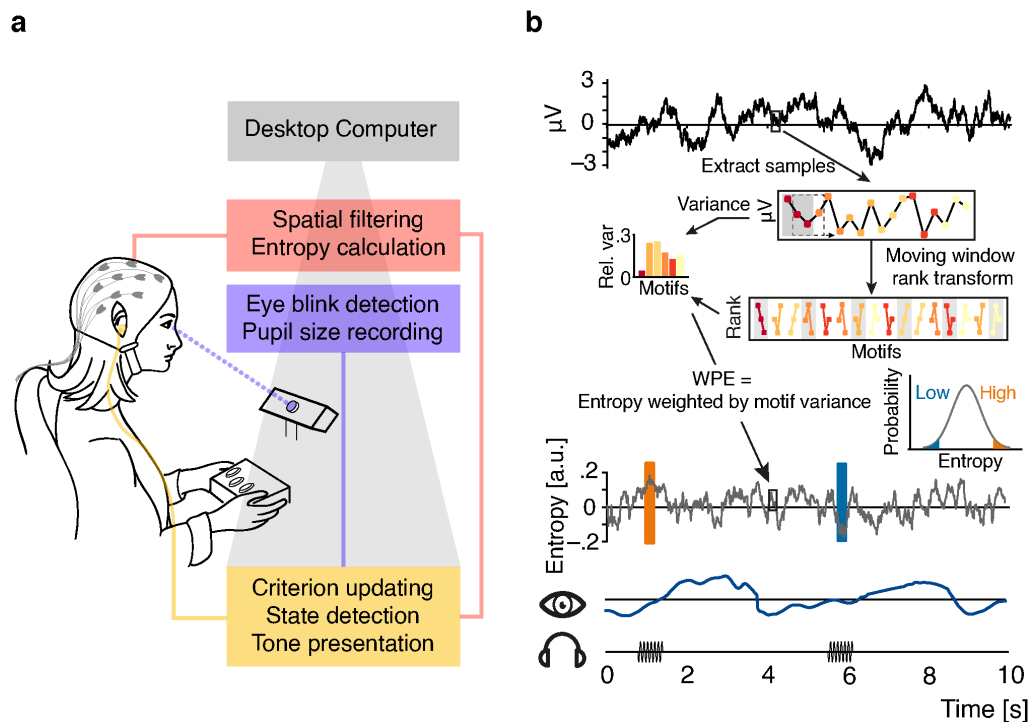

159

160 **Figure 1. Illustration of the real-time closed-loop setup to track states of**

161 **desynchronization (a)** Setup: EEG signal was spatially filtered before entropy

162 calculation. Pupil size was recorded and monitored consistently. Pure tone stimuli

163 were presented via in-ear headphones during states of high or low entropy of the

164 incoming EEG signal. **(b)** Schematic representation of the real-time algorithm: spatially

165 filtered EEG signal (one virtual channel) was loaded before entropy was calculated

166 using a moving window approach (illustrated for 18 samples in the upper box; 200

167 samples were used in the real-time algorithm). Voltage values were transformed into

168 rank sequences (“motifs”) separated by one sample (lower box; Eq. 1 in Methods;

169 different colours denote different motifs), and motif occurrence frequencies were

170 weighted by the variance of the original EEG data constituting each occurrence

171 (equation 3 & 4). Each entropy value was calculated based on the resulting conditional

172 probabilities of 200 samples, before the window was moved 10 samples forward (i.e.,

173 effectively down-sampling to 100 Hz). Inset: The resulting entropy time-course was

174 used to build a continuously updated distribution (forgetting window = 30 s). Ten

175 consecutive entropy samples higher than 90% (or lower than 10%) of the currently

176 considered distribution of samples defined states of relatively high and low

177 desynchronization, respectively. Additionally, pupil size was sampled continuously.

178

179 **Results**

180 We recorded EEG and pupillometry while participants (N = 25; 19–31 years old)  
181 performed an auditory pitch discrimination task. On each trial participants were  
182 presented with one tone, taken from a set of seven pure tones (increasing pitch from  
183 tone 1 through tone 7), and had to decide whether that tone was rather high or low in  
184 pitch with regard to the overall set of tones. Participants thus compared each tone to  
185 an implicit standard, the median (= mean) pitch of the set. This yielded in all  
186 participants a valid psychometric function mapping stimulus pitch to perceptual  
187 decisions (see Fig. 5 supplement 2).

188 Critically, by means of a real-time closed-loop algorithm (see Fig. 1), tones were  
189 presented during states of relatively high or low entropy of auditory cortical EEG, a  
190 proxy of local cortical desynchronization. By collapsing offline across the whole  
191 experiment, we obtained data that covered the whole range of desynchronization  
192 states occurring in a given participant (Jazayeri and Afraz, 2017). We then combined  
193 (generalized) linear mixed-effects models and psychophysical modelling to test the  
194 effects of local cortical desynchronization as well as pupil-linked arousal on (1) ongoing  
195 as well as sensory-related EEG activity, and on (2) perceptual performance.

196

197 *Real-time closed-loop algorithm dissociates desynchronization states*

198 Entropy of EEG signals emerging from auditory cortices was calculated with the help  
199 of an established, functional-localizer-based spatial filter (see Fig. 2a; de Cheveigne &  
200 Simon, 2008; Herrmann, Maess, & Johnsrude, 2018a) and a custom real-time algorithm  
201 (Fig. 1). Source projection of localizer data which were used to construct the subject-  
202 specific spatial filters revealed predominantly auditory cortical regions as generators  
203 (Fig. 2a).

204 Note that the distribution of entropy values which provided the basis for the  
205 classification of relatively high vs. relatively low desynchronization states was updated  
206 continuously, with two crucial consequences: First, this approach minimized the  
207 potential impact of slow drifts in desynchronization on brain state classification.  
208 Second, the continuously updated criterion allowed us to, effectively, sample the  
209 whole state space of local desynchronization states: Depending on the current  
210 distribution, the same absolute entropy value could be classified as a high state, for  
211 example in the beginning of the experiment, and as a low state half an hour later. This  
212 focus on local, short-lived states resulted in widely overlapping pre-stimulus entropy  
213 distributions of high and low states (Fig. 2c) which were then used as continuous  
214 predictor alongside the equally continuous pupil-size in all subsequent analyses.

215 Demonstrating the performance of the real-time algorithm, average entropy  
216 time-courses were elevated for all classified-high compared to all classified-low states  
217 in a 200 ms pre-stimulus window (all  $P < .001$ , FDR corrected; Fig. 2b). Note that this  
218 result is non-trivial. Since we continuously updated the criterion for state detection, in  
219 theory, states classified online as high and low could have yielded the same average  
220 entropy across the entire experiment.

221 In contrast, pupil diameter time-courses did not differ between high and low  
222 entropy states at any point in time (all  $P > .1$ ) nor did the distributions of pre-stimulus  
223 pupil diameters (Fig. 2c). In line with previous research (Reimer et al., 2014), pupil size

224 and entropy in the pre-stimulus time window were positively related ( $\beta = .02$ ,  $SE = .01$ ,  
225  $P = .02$ ). Pupil size explained less than 1% of the variance in EEG entropy.

226 Furthermore, auditory cortical desynchronization and pupil linked arousal, as  
227 approximated by EEG entropy and pupil size, displayed different autocorrelation  
228 functions (Fig. 2b). While EEG entropy states were self-similar on an approximate ~500  
229 ms scale, states of pupil size extended over several seconds.

230 Most relevant to all further analyses, we conclude that states of local cortical  
231 desynchronization in auditory cortex and pupil-linked arousal predominantly occurred  
232 independently of each other.

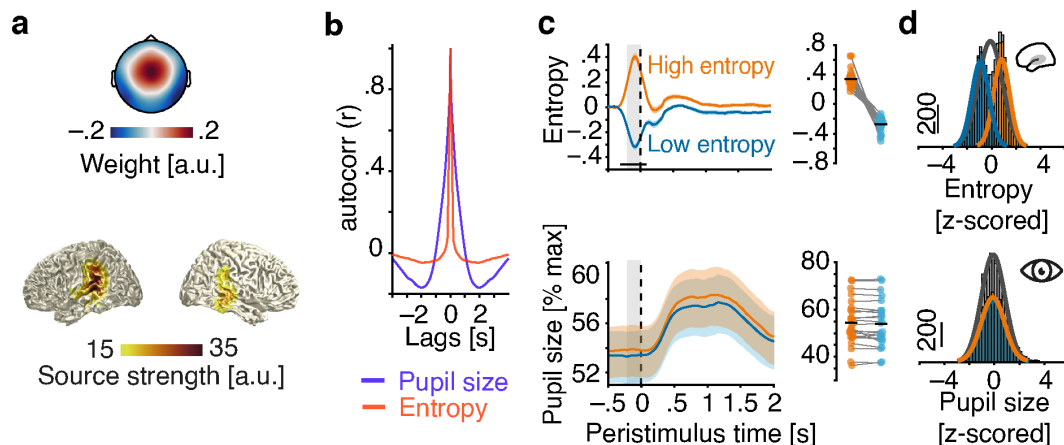

233

234 **Figure 2. Evaluation of the real-time closed-loop setup for states of local**  
235 **desynchronization and arousal.** (a) Grand average spatial filter weights based on  
236 data from an auditory localizer task (top) and grand average source projection of the  
237 same data (masked at 70% of maximum; bottom). (b) Autocorrelation functions for EEG  
238 entropy (red) and pupil size time courses (blue). Entropy states are most self-similar at  
239 ~500 ms (~2 Hz) and pupil states at ~2 s (~0.5 Hz). (c) Grand average time-courses of  
240 entropy (upper panel) and pupil diameter (lower panel) for low-entropy (blue) and  
241 high-entropy states (orange)  $\pm$  standard error of the mean (SEM). Subject-wise  
242 averages in the pre-stimulus time-window (-200–0 ms, grey boxes) in right panels.  
243 Entropy was logit transformed and baseline corrected to the average of the preceding  
244 3 seconds for illustration. Pupil size was expressed as percentage of each participant's  
245 maximum pupil diameter across all pre-stimulus time-windows. (d) Histograms and  
246 fitted distributions of absolute z-scored pre-stimulus entropy (top) and z-scored pupil  
247 size (bottom) for low-entropy states (blue), high-entropy states (orange), and both  
248 states combined (grey). Note the independence of entropy states and pupil states.

249 The following figure supplements are available for figure 1:

250 **Figure 2 supplement 1.** EEG entropy as a marker of E/I balance based on anaesthesia  
251 recordings from Sarasso et al. (2015)

252



253 *Local cortical desynchronization and pupil-linked arousal pose distinct states of ongoing*  
254 *activity*

255 To dissociate the corollaries of local cortical desynchronization and pupil-linked  
256 arousal on ongoing EEG activity, we modelled single trial pre-stimulus oscillatory  
257 power over auditory cortical areas as a function of pre-stimulus entropy and pupil  
258 diameter by jointly including them as predictors in linear mixed-effects models. Of  
259 note, non-baselined values of EEG entropy and pupil size were used as predictors but  
260 baseline values of EEG entropy were included as covariates to control for the influence  
261 of slow temporal drifts. This approach has been suggested previously (Senn, 2006), is  
262 widely used in functional imaging (Kay et al., 2008), and is more reliable than  
263 conventional baseline subtraction methods (Alday, 2019). All analyses of ongoing or  
264 stimulus-related EEG activity were carried out on the spatially filtered EEG signal,  
265 allowing us to concentrate on brain activity dominated by auditory cortical regions.

266 As expected based on the definition of entropy and earlier results (Waschke et  
267 al., 2017), these analyses revealed a negative relationship of entropy and oscillatory  
268 power within the pre-stimulus time window (-200–0 ms; Fig. 3). With increasing pre-  
269 stimulus entropy, low-frequency pre-stimulus power decreased (1–8 Hz, linear:  $\beta = -$   
270  $.18$ ,  $SE = .01$ ,  $P < .001$ ; quadratic:  $\beta = .03$ ,  $SE = .009$ ,  $P < .005$ ; Table S1). Gamma power  
271 (40–70 Hz) also decreased (linear:  $\beta = -.18$ ,  $SE = .01$ ,  $P < .001$ ; Table S2). Gamma power  
272 was lowest at intermediate entropy levels (quadratic effect;  $\beta = .06$ ,  $SE = .009$ ,  $P < .001$ ).  
273 Furthermore, EEG entropy was negatively related to pre-stimulus alpha power (8–12  
274 Hz,  $\beta = -.29$ ,  $SE = .01$ ,  $P < .001$ ; Figure 3 supplement 1 & Table S3) and beta power (14–  
275 30 Hz,  $\beta = -.32$ ,  $SE = .01$ ,  $P < .001$ , Figure 3 supplement 1 & Table S4). Auditory EEG  
276 entropy hence aptly approximates the degree of auditory cortical desynchronization  
277 over a wide range of frequencies.

278 Analogously, pupil size was associated with a decrease in pre-stimulus low-  
279 frequency power (1–8 Hz, linear:  $\beta = -.04$ ,  $SE = .01$ ,  $P < .001$ ; quadratic:  $\beta = .016$ ,  $SE =$   
280  $.006$ ,  $P < .05$ ; Table S2) but did not display a substantial relationship with gamma power  
281 (all  $P > .2$  see Fig. 3; Table S3). Notably, pupil size was positively related with pre-  
282 stimulus beta power (14–30 Hz,  $\beta = .04$ ,  $SE = .01$ ,  $P < .001$ ; Figure 3 supplement 1 &  
283 Table S4) but not with alpha power (all  $P > .3$ ).

284 To directly compare the relative contribution of EEG entropy and pupil size on  
285 ongoing EEG activity, respectively, we computed a Wald statistic ( $Z_{Wald}$ ). The Wald  
286 statistic puts the difference between two estimates from the same model in relation to  
287 the standard error of their difference. The resulting Z-value can be used to test against  
288 equality of the two estimates. The stronger negative linear link of EEG entropy with  
289 low-frequency power compared to pupil size was supported by the Wald test ( $Z_{Wald} =$   
290  $9.1$ ,  $P < .001$ ). Put differently, in these stimulus-free periods in auditory cortex, low-  
291 frequency power was low given strong desynchronization, while it was additionally,  
292 yet more weakly, influenced by pupil-linked arousal. Notably, both patterns of results  
293 did not hinge on the exact choice of frequency ranges.

294 High-desynchronization states were thus characterized by reduced oscillatory  
295 broad-band power overall, while high-arousal states were accompanied by a decrease  
296 in low-frequency power and an increase in higher-frequency (beta) power.

297

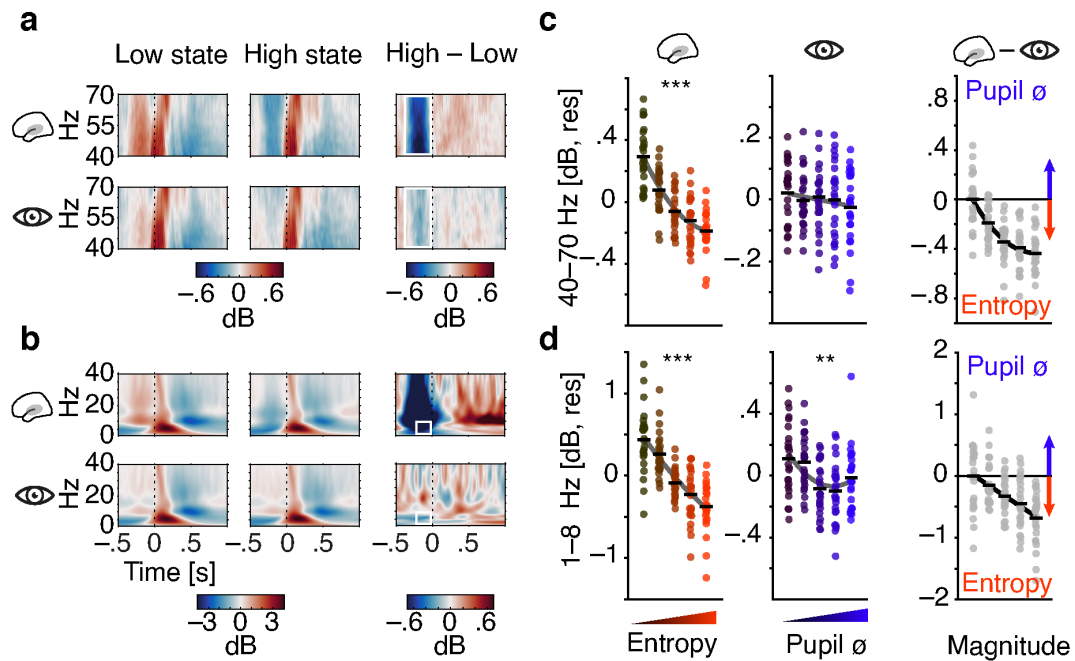

298

299 **Figure 3. Contribution of pre-stimulus entropy and pupil size to ongoing auditory**  
 300 **cortical EEG activity.** (a) Grand average gamma power across time (40–70 Hz,  
 301 baselined to the whole trial average, in dB) for low states (left), high states (middle) and  
 302 the difference of both (right). Entropy states are shown in the upper panel, pupil states  
 303 in the lower panel. Dashed line represents tone onset, white rectangle outlines the pre-  
 304 stimulus window of interest. (b) As in (a) but for 0–40 Hz. (c) Mean-centred single  
 305 subject (dots) and grand average gamma power (black lines) in the pre-stimulus time-  
 306 window (-.4–0 s), residualized for baseline entropy and pupil size, shown for five bins  
 307 of increasing pre-stimulus entropy (left) and pupil size (residualized for entropy  
 308 baseline and pre-stimulus entropy, middle). Grey line represents average fit, red  
 309 colours show increasing entropy, blue colours increasing pupil size. Effects of entropy  
 310 and pupil size are contrasted in the right panel. (d) As in (c) but for low-frequency  
 311 power (1–8 Hz). Note the different y-axis range between entropy and pupil effects. All  
 312 binning for illustrational purposes only. \*\*\* $P < .0001$ , \*\* $P < .001$

313 The following figure supplements are available for figure 3:

314 **Figure 3 supplement 1.** Ongoing activity in the alpha and beta band as a function of  
 315 EEG entropy and pupil size.

316 **Figure 3 supplement 2.** Supplementary Table S1 corresponding to panel b and d.

317 **Figure 3 supplement 3.** Supplementary Table S2 corresponding to panel a and c.

318

319 *Differential effects of local desynchronization and pupil-linked arousal on auditory evoked*  
 320 *activity*

321 Next, to investigate the influence of those pre-stimulus states on sensory processing,  
 322 we tested the impact of local cortical desynchronization and pupil-linked arousal in  
 323 this pre-stimulus time window on auditory, stimulus-evoked EEG activity. Analogous  
 324 to the procedure outlined above, we used linear mixed-effects models to estimate the  
 325 effects of entropy and pupil size on sensory evoked power and phase coherence over  
 326 auditory cortices. Note that we modelled continuous variables instead of an artificial  
 327 division into high vs. low states. While low-frequency phase coherence quantifies how  
 328 precise in time neural responses appear across trials, low-frequency power captures

329 the magnitude of neural responses regardless of their polarity (Tallon-Baudry et al.,  
330 1996; Makeig et al., 2004). In addition, high-frequency power after stimulus onset likely  
331 originates from sensory regions and depicts sensory processing (Tiitinen et al., 1993).  
332 If EEG entropy and pupil size entail perceptual relevance, they should also influence  
333 sensory processing as approximated by the outlined measures. Please note that all  
334 measures of sensory processing were based on artefact-free EEG data.

335 First, we found low-frequency single-trial phase coherence after stimulus onset,  
336 a measure quantifying the consistency of phase-locked responses on a trial-wise basis  
337 (see Methods for details), to increase with pre-stimulus entropy (1–8 Hz, 0–400 ms;  $\beta =$   
338  $.05$ ,  $SE = .01$ ,  $P < .001$ , Fig. 4a, d). Additionally, phase coherence did not only increase  
339 with pre-stimulus entropy but saturated at intermediate levels, as evidenced by a  
340 negative quadratic effect ( $\beta = -.02$   $SE = .009$ ,  $P = .02$ , supplementary Table S9).

341 Of note, there was no comparable relationship of pupil size and single-trial  
342 phase coherence (1–jITC, see methods for details;  $\beta = -.005$ ,  $SE = .006$ ,  $P = .5$ ;  $Z_{Wald} = 1.5$ ,  
343  $P = .1$ ; Table S9). Phase-locked responses hence increased with pre-stimulus auditory  
344 cortical desynchronization but were unaffected by variations in arousal.

345 Second, we observed a linear decrease of low-frequency power after stimulus  
346 onset, as a function of pre-stimulus entropy (1–8 Hz, 0–400 ms;  $\beta = -.02$ ,  $SE = .01$ ,  $P =$   
347  $.017$ , Fig. 4b, e). In contrast, pre-stimulus pupil size did not affect post-stimulus power  
348 ( $\beta = .015$ ,  $SE = .011$ ,  $P = .2$ ; Table S5). Visual inspection of figure 4 yields increased post-  
349 stimulus desynchronization that occurs after the evoked response as the likely source  
350 of the EEG entropy related decrease in stimulus-evoked low-frequency power.  
351 Therefore, stimulus-induced activity in low frequencies changed linearly with auditory  
352 cortical desynchronization but remained unaltered under changing levels of pupil-  
353 linked arousal ( $Z_{Wald} = 2.6$ ,  $P = .009$ ). Notably, post-stimulus oscillatory power in the  
354 alpha band increased linearly with pupil linked arousal ( $\beta = .033$ ,  $SE = .01$ ,  $P < .005$ ; Fig.  
355 4 supplement 2 & Table S6) but not with auditory cortical desynchronization ( $\beta = -.008$ ,  
356  $SE = .009$ ,  $P = .5$ ). Oscillatory power in the beta band was neither substantially linked to  
357 pre-stimulus auditory cortical desynchronization nor pupil-linked arousal (all  $P > .2$ , see  
358 supplementary Table S7).

359 Third, we detected linearly increasing post-stimulus gamma power,  
360 representing early auditory evoked activity, with rising pre-stimulus entropy (40–70  
361 Hz, 0–400 ms;  $\beta = .04$ ,  $SE = .01$ ,  $P < .001$ , Fig. 4c, f). Conversely, post-stimulus gamma  
362 power showed a tendency to decrease with growing pre-stimulus pupil size that did  
363 not reach statistical significance ( $\beta = -.016$ ,  $SE = .01$ ,  $P = .1$ ; Table S8). Auditory evoked  
364 gamma power hence was inversely influenced by two different measures of brain  
365 state: while it increased with local cortical desynchronization, it decreased with  
366 growing arousal ( $Z_{Wald} = 3.6$ ,  $P = .0003$ ). Notably, neither local desynchronization nor  
367 pupil size had any effect on the tone-evoked activity when expressed as event-related  
368 potentials (see Fig. 4 supplement 1).

369 Overall, single-trial auditory sensory evoked activity was differentially  
370 influenced by desynchronization and arousal. While only higher local  
371 desynchronization was associated with increased phase-locked responses, only  
372 arousal was positively linked to stimulus-induced activity. In addition, with local  
373 desynchronization showing a positive and arousal a negative link to stimulus-evoked  
374 gamma power, both measures exert opposite influences on the early processing of  
375 auditory information.

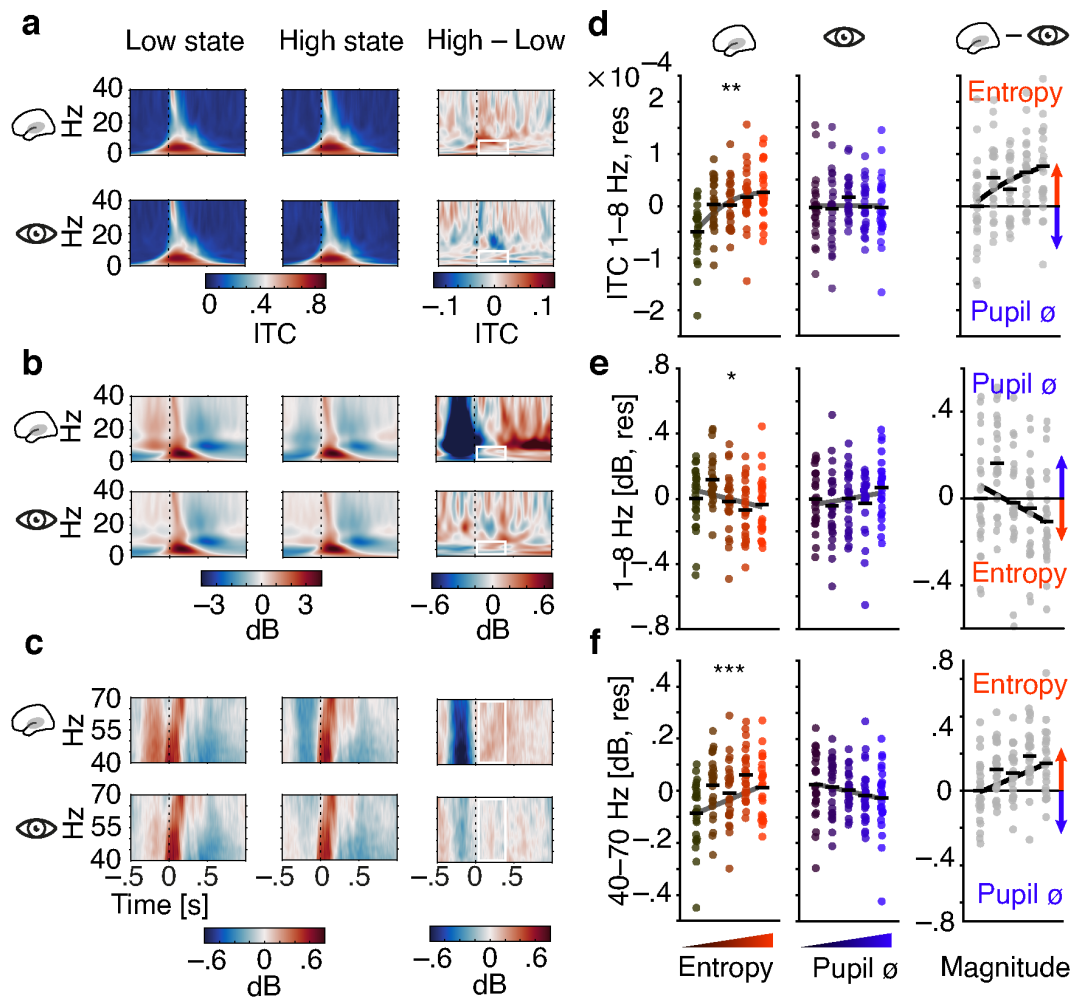

376

377

378 **Figure 4. Influence of pre-stimulus entropy and pupil size on tone-related**

379 **activity.** (a) Grand average ITC (0–40 Hz) across time for low states (left), high states

380 (middle) and the difference of both (right). Entropy states shown in the upper, pupil

381 states in the lower panel. Dashed black lines indicate tone onset, white rectangles the

382 post-stimulus window of interest. (b) As in (a) but for low-frequency power (0–40 Hz,

383 baselined the average of the whole trial). (c) As in (b) but for gamma power (40–70 Hz).

384 (d) Mean centred single subject (dots) and grand average ITC (black lines), residualized

385 for baseline entropy and pupil size, in the post-stimulus time-window (0–.4 s, 1–8 Hz)

386 for five bins of increasing pre-stimulus entropy (left) and pupil size (residualized for

387 entropy baseline and pre-stimulus entropy, middle). Grey line represents average fit,

388 red colours increasing entropy, blue colours increasing pupil size. Effects of entropy

389 and pupil size are contrasted in the right panel. (e) As in (d) but for post-stimulus low-

390 frequency power (0–.4 s, 1–8 Hz). (f) As in (e) but for post-stimulus gamma power (0–.4

391 s, 40–70 Hz). Again, all binning for illustrational purposes only. \*\*\* $P < .0001$ , \*\* $P < .001$ ,

\* $P < .05$

392 The following figure supplements are available for figure 4:

393 **Figure 4 supplement 1.** Grand average ERPs for increasing pre-stimulus entropy and

394 pupil size.

395 **Figure 4 supplement 2.** Tone-related activity in the alpha and beta band as a function

396 of pre-stimulus EEG entropy and pupil size.

397 **Figure 4 supplement 3.** Supplementary Table S5 corresponding to panel b and e.

398 **Figure 4 supplement 4.** Supplementary Table S8 corresponding to panel c and f.

399 **Figure 4 supplement 5.** Supplementary Table S9 corresponding to panel a and d.

400

401 *Local desynchronization and arousal differently impact perceptual performance*

402 To examine the impact of desynchronization and arousal on perceptual performance,  
403 we modelled binary response behaviour (“high” vs. “low”) as a function of stimulus  
404 pitch, pre-stimulus local desynchronization, and arousal using generalized linear  
405 mixed-effects models (see *Statistical analyses* for details). In brief, this statistical  
406 approach describes binary choice behaviour across the set of used tones and thus also  
407 yields a psychometric function, but the generalized linear framework allows us to  
408 include the neural predictors of interest. Two parameters of the resulting functions  
409 were of interest to the current study: (1) the threshold of the psychometric function  
410 represents the response criterion; (2) the slope of the psychometric function expresses  
411 perceptual sensitivity. Additionally, we tested the influence of local desynchronization  
412 and arousal on response speed (i.e., the inverse of response time, in  $s^{-1}$ ). Note that  
413 models always included linear as well as quadratic terms in order to test the shape of  
414 the investigated brain-behaviour relationships.

415 Participants were least biased and answered fastest at intermediate levels of  
416 pre-stimulus desynchronization: pre-stimulus entropy displayed a negative quadratic  
417 relationship with response criterion (log odds (log OR) =  $-.06$ , SE =  $.02$ ,  $P = .02$ ; Fig. 5a,  
418 Table S10) and response speed ( $\beta = -.012$ , SE =  $.004$ ,  $P = .002$ ; Fig.5c, Table S11). A  
419 reduced model that allowed the inclusion of single-subject effects as random slopes  
420 revealed that this negative quadratic effect of entropy on response criterion was  
421 observable in all participants (see Fig. 5a). Average predicted response times were  
422 lowest following intermediate pre-stimulus entropy (.716 s) compared to low (.762 s)  
423 and high (.786 s) entropy. States of intermediate neural desynchronization hence led  
424 to a reduction in response time of 50–60 ms compared to high and low  
425 desynchronization states.

426 Conversely, participants proved most sensitive at intermediate levels of arousal:  
427 pupil size exhibited negative linear as well as quadratic relations with sensitivity (linear:  
428 log OR =  $-.232$ , SE =  $.068$ ,  $P = .001$ ; quadratic: log OR =  $-.153$ , SE =  $-.035$ ,  $P < .001$ ; Table  
429 S10) but not with response speed ( $\beta = -.004$ , SE =  $.003$ ,  $P = .1$ ; Fig. 5d, Table S11). As  
430 above, a model including random slopes resulted in negative effects for the vast  
431 majority of participants (see Fig. 5b). Highest sensitivity hence coincided with  
432 intermediate arousal and decreased with growing arousal levels.

433 Like pre-stimulus entropy, pupil size did covary with response criterion.  
434 However, the relationship was linearly decreasing (high arousal coincided with a  
435 decreased criterion; log OR =  $-.115$ , SE =  $.028$ ,  $P < .001$ ; Fig 5c, Table S10) and lacked the  
436 marked quadratic relationship observed for pre-stimulus entropy (cf. Fig. 5a). The  
437 increase in bias with arousal was clearly driven by states of particularly high arousal.

438 In analogy with the approach outlined above for brain–brain models, we  
439 computed Wald statistics to assess the distinctness of different quadratic model terms.  
440 While response criterion was predicted by EEG entropy following an inverted U shape  
441 but not by pupil size ( $Z_{\text{Wald}} = -2.9$ ,  $P = .004$ ), response speed was predominantly  
442 influenced by pre-stimulus entropy ( $Z_{\text{Wald}} = -1.94$ ,  $P = .05$ ). Conversely, pupil size  
443 predicted sensitivity better than EEG entropy ( $Z_{\text{Wald}} = 1.6$ ,  $P = .1$ ) although this  
444 comparison did not yield a statistically significant result. Of note, modelling decisions  
445 based on stimulus difficulty alone explained 56.4 % of variance (conditional  $R^2$ ) while a

446 model that additionally contained pre-stimulus EEG entropy and pupil size as  
 447 predictors explained 63.2 % of variance in behaviour.

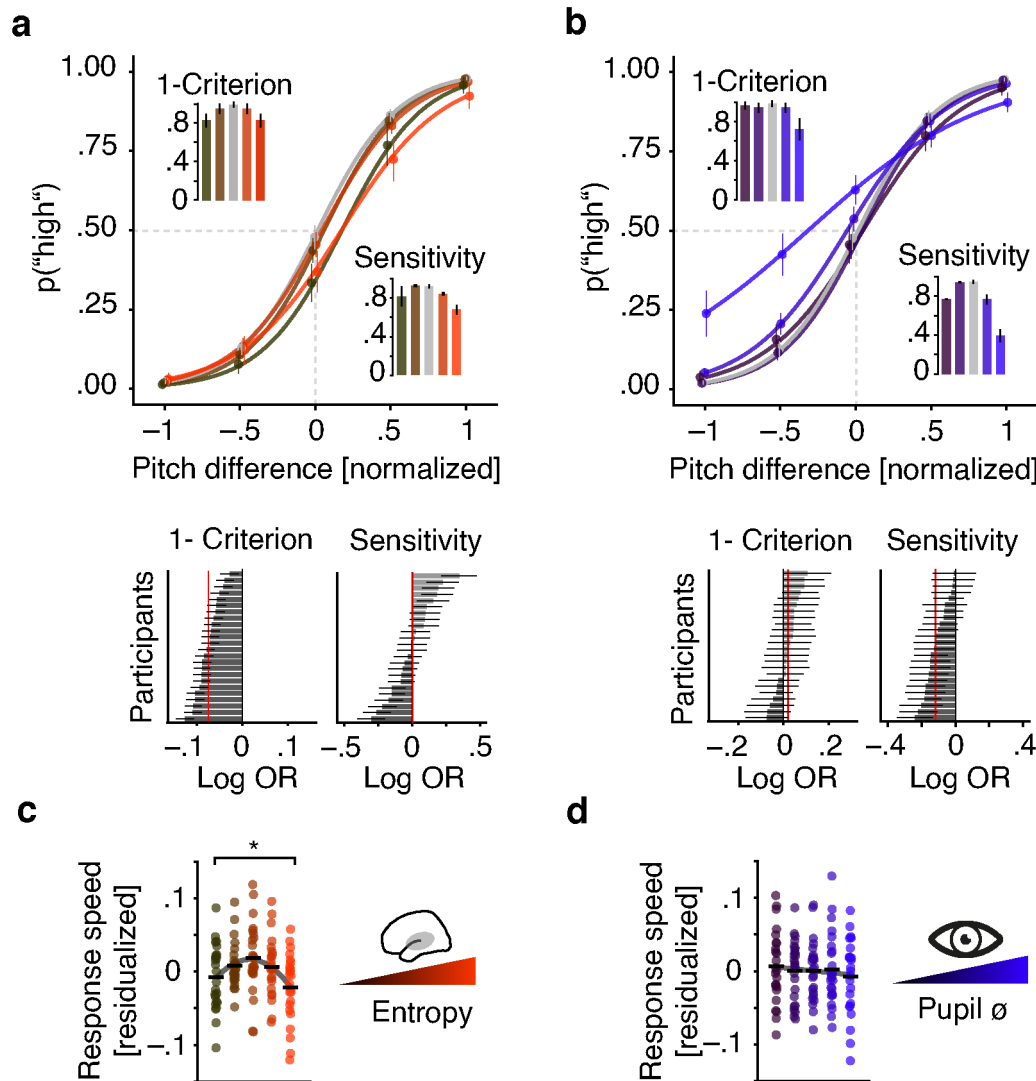

448

449 **Figure 5. Effects of pre-stimulus entropy and pre-stimulus pupil size on**  
 450 **perceptual performance. (a)** Fixed effects results: probability of judging one tone as  
 451 “high” as a function of pitch difference from the median (normalized), resulting in  
 452 grand average psychometric functions for five bins of increasing entropy (red colours)  
 453 including point estimates  $\pm 1$  SEM. Dashed grey lines indicate bias-free response  
 454 criterion. Insets show 1-criterion (upper) and sensitivity estimates (lower)  $\pm 2$  SEMs.  
 455 Bottom left panel shows single subject log odds (log OR) for the quadratic relationship  
 456 of pre-stimulus entropy and response criterion ( $\pm 95\%$  CI), bottom right panel single  
 457 subject log ORs for the quadratic relationship of pre-stimulus entropy and sensitivity.  
 458 Participants sorted for log OR, red line marks fixed effect estimate. **(b)** As in (a) but for  
 459 five bins of increasing pre-stimulus pupil size. **(c)** Single subject (dots) and average  
 460 response speed (black lines) as a function of increasing pre-stimulus entropy (five bins).  
 461 **(d)** As in (c) but as a function of pre-stimulus pupil size. Again, all binning for illustration  
 462 only. \*  $P < .005$

463 The following figure supplements are available for figure 5:

464 **Figure 5 supplement 1.** Overview of fixed and random effects.

465 **Figure 5 supplement 2.** Single participant psychometric functions.

466 **Figure 5 supplement 3.** Supplemental Table S10 corresponding to panel a and b.

467 **Figure 5 supplement 4.** Supplemental Table S11 corresponding to panel c and d.

468 *Control analyses*

469 *Pre-stimulus oscillatory power in auditory cortex does not predict behavioural outcome in*  
470 *the auditory discrimination task.*

471 The substantial negative correlation of desynchronization states quantified by entropy  
472 on the one hand and low-frequency oscillatory power on the other (see Fig. 3; Marguet  
473 & Harris, 2011; Waschke et al., 2017) prompted us to repeat the modelling of perceptual  
474 performance with pre-stimulus power instead of entropy as a predictor. If entropy only  
475 represents the inverse of oscillatory power, effects should remain comparable but  
476 change their sign. Oscillatory power however was not significantly linked to behaviour  
477 (all  $P > .15$ ) and including power as an additional predictor in the model of performance  
478 outlined above did not explain additional variance (model comparison; Bayes factor  
479  $BF_{\text{Entropy-Power}} = 98$ ). Thus, local cortical desynchronization but not oscillatory power was  
480 linked to perceptual performance.

481

482 *Visuo-occipital entropy does not predict behavioural outcome in the auditory*  
483 *discrimination task.*

484 To test the cortico-spatial specificity of the outlined desynchronization states to the  
485 auditory domain, we repeated all analyses of stimulus-evoked activity and behaviour  
486 based on entropy as calculated from visuo-occipital channels. Specifically, we replaced  
487 auditory entropy with visual entropy before re-running all relevant models (see  
488 Methods for details).

489 Unsurprisingly, as these spatial filter weights yield imperfect renderings of  
490 local cortical activity, we observed a sizable correlation between this visuo-occipital  
491 entropy signal and the auditory entropy signal central to our analyses ( $\beta = .40$ ,  $SE =$   
492  $.009$ ,  $P < .001$ ). However, since visual and auditory entropy were also sufficiently  
493 distinct (shared variance only  $R^2 = 15\%$ ), more detailed analyses on their specific  
494 effects were warranted.

495 We first regressed this visuo-occipital entropy signal on pupil size and  
496 observed a weak negative relationship ( $\beta = -.02$ ,  $SE = .009$ ,  $P = .03$ ). Relationships of  
497 pre-stimulus entropy over visual cortex with stimulus-evoked auditory activity  
498 generally displayed the same direction as for auditory cortex entropy (see Fig. 6a for  
499 summary). Adding to the domain specificity of our main findings, however, visual  
500 cortex entropy was a markedly weaker predictor of single-trial phase coherence  
501 (model comparison to a model with auditory entropy; Bayes factor  $BF_{\text{Auditory-Visual}} =$   
502  $1416$ ), low-frequency power ( $BF_{\text{Auditory-Visual}} = 1977$ ), and gamma power ( $BF_{\text{Auditory-Visual}} =$   
503  $39$  see Fig. 6). Furthermore, visual cortex entropy did not exhibit any relationship with  
504 response criterion ( $\log OR = .009$ ,  $SE = .02$ ,  $P = .66$ ; Table S12). Visual cortex entropy also  
505 had no effect on response speed ( $\beta = -.002$ ,  $SE = .003$ ,  $P = .50$ ). Accordingly, auditory  
506 cortex entropy explained the response speed data better ( $BF_{\text{Auditory-Visual}} = 10.8$ ).

507 The influence of pre-stimulus desynchronization on stimulus processing and  
508 behaviour thus proves to be local in nature, and most selective to desynchronization  
509 in sensory regions that are involved in the current task.

## 510 **Discussion**

511 This study tested the influence of local cortical desynchronization and pupil-linked  
512 arousal on sensory processing and perceptual performance. We recorded EEG and  
513 pupillometry, while stimuli of a demanding auditory discrimination task were  
514 selectively presented during states of high or low desynchronization in auditory cortex.  
515 Desynchronization in auditory cortex and pupil-linked arousal differentially affected  
516 ongoing EEG activity and had distinct effects on stimulus-related responses.  
517 Furthermore, at the level of single trials, we found unbiased performance and highest  
518 response speed to coincide with intermediate levels of pre-stimulus  
519 desynchronization and highest sensitivity following intermediate levels of arousal.

### 520 *Tracking of auditory cortical desynchronization in real-time*

521 As revealed by the average spatial filter and source projection (Fig. 2), the signal central  
522 to the present analyses mainly originated from auditory cortical areas. The state-  
523 detection algorithm we employed was based on entropy of the spatially filtered EEG  
524 signal and performed the desired state-dependent presentation with sufficient  
525 precision in time (Fig. 2b). Of note, the distribution used to classify desynchronization  
526 states in real-time was updated constantly, which ensured two central prerequisites:  
527 First, slow drifts in desynchronization over time were prevented from biasing the state  
528 classification. Second, we were able to sample, throughout the experiment, the whole  
529 desynchronization state space within each participant (Jazayeri and Afraz, 2017). In  
530 contrast to an algorithm that sets the criterion for state classification only once per  
531 participant and leaves it unchanged thereafter (“open-loop”), the current approach  
532 can be referred to as a closed-loop. Technical advances have promoted the use of such  
533 closed-loop paradigms to various areas of neuroscientific research, where the main  
534 application lies in neurofeedback. Neurofeedback tries to modify behaviour by  
535 providing participants with sensory information that is directly proportional to their  
536 current brain state (Sitaram et al., 2016; Faller et al., 2019). Just recently, a number of  
537 methodically sophisticated studies have used the power of this approach to relate  
538 fluctuations in working memory (Ezzyat et al., 2018) or decision making (Peixoto et al.,  
539 2019) to brain activity in real-time.

540

### 541 *Local cortical desynchronization and arousal differentially shape states of ongoing EEG* 542 *activity*

543 While there was a pronounced difference in EEG entropy between states of high and  
544 low desynchronization, illustrating the power of the used real-time algorithm, no such  
545 difference was found for the time-course of pupil size (Fig. 2). Although pupil size and  
546 EEG entropy were positively correlated as has been reported before (Reimer et al.,  
547 2014), a major part of the variance in EEG entropy was not accounted for by pupil size.  
548 We take this as a first piece of evidence that two distinct mechanisms are involved in  
549 the generation of perceptually relevant brain states.

550 The dissociation of both processes is further corroborated by the difference in  
551 their respective autocorrelations. Auditory cortical desynchronization displayed a  
552 narrower autocorrelation function than pupil size (Fig. 2b), suggesting two different  
553 time scales of operation. Such a finding aligns with a recent study that suggests at least  
554 two different time scales that together shape neural activity (Okun et al., 2019). On the  
555 one hand, fast fluctuations have been suggested to depict synaptic activity and



556 potentially trace back to thalamo- or cortico-cortical interactions (Haider and  
557 McCormick, 2009; Harris and Thiele, 2011). On the other hand, slow fluctuations  
558 potentially depict the influence of arousal or neuromodulatory activity in general  
559 (Okun et al., 2019). While states of local desynchronization likely operate on short time  
560 scales in the range of several hundred milliseconds, pupil-linked arousal states rather  
561 stretch across several seconds.

562 Furthermore, changing degrees of desynchronization and arousal manifested  
563 in diverse ways in the ongoing EEG: On the one hand, desynchronization in the pre-  
564 stimulus time window was negatively related to concurrently measured oscillatory  
565 power over a wide range of frequencies (Fig. 3). The strong negative relationship with  
566 low-frequency power replicates previous findings and is tightly linked to the concept  
567 of entropy (Waschke et al., 2017). On the other hand, pupil-linked arousal in the same  
568 time window was negatively linked to low-frequency power, an association frequently  
569 observed in invasive recordings of non-human animals (McGinley et al., 2015b; Vinck  
570 et al., 2015). Additionally, arousal was positively related to oscillatory power in the beta  
571 band but not in the gamma band. This link of arousal and beta power in EEG differs  
572 from reports of a positive relationship between gamma power of local field potentials  
573 (LFP) and pupil size (Vinck et al., 2015). Of note, Vinck and colleagues (2015) correlated  
574 pupil diameter and LFP gamma power over time within an event-locked time period.  
575 In contrast, we related the average pupil diameter in a pre-stimulus time window to  
576 spontaneous EEG gamma power across trials. Upon further experimentation, differing  
577 methods thus pose the most parsimonious reason for this seeming disparity.

578 Taken together, the distinct relationships that desynchronization and arousal  
579 entertain with key, frequency-domain metrics of instantaneous EEG activity emphasize  
580 their independence. We take this as additional evidence for two distinct mechanisms  
581 of origin.

582

### 583 *Neurophysiological and neuromodulatory processes of desynchronization and arousal*

584 How plausible is this idea of at least two, at least partially segregate drivers of  
585 perceptually relevant brain state? LC-NE activity has been proposed to reflect changes  
586 in arousal captured by variations in pupil size (Aston-Jones and Cohen, 2005). Although  
587 fluctuations in pupil size have recently been linked to activity in the superior colliculus  
588 (Wang et al., 2012) or the ventral tegmental area (de Gee et al., 2017) and also carry  
589 information about cholinergic activity (Reimer et al., 2016), converging evidence  
590 suggests a tight connection to LC-NE activity (Aston-Jones and Cohen, 2005; Joshi et  
591 al., 2016; Reimer et al., 2016; de Gee et al., 2017). At the same time, in addition to  
592 adrenergic and cholinergic projections from brain-stem nuclei, glutamatergic cortico-  
593 cortical and thalamo-cortical feedback connections have been proposed as a source of  
594 varying states of desynchronization (Harris and Thiele, 2011). The widespread NE  
595 projections from LC (Aston-Jones and Cohen, 2005) are a likely cause for the  
596 demonstrable effects of NE-linked arousal on sensory encoding in both the auditory  
597 (McGinley et al., 2015a) as well as visual domain (Vinck et al., 2015). This rationale would  
598 thus predict that arousal states should not differ substantially between different  
599 sensory cortical regions.

600 However, modulatory effects of arousal have been found to depend on the  
601 experimental context as well as on the sensory modality (Pakan et al., 2016; Shimaoka

602 et al., 2018). The weak correlation of desynchronization and arousal might thus trace  
603 back to our focus on auditory cortical areas. An imperfect direct arousal–  
604 desynchronization link in the present data becomes more plausible if we take into  
605 account the important distinction between global and local brain states: While the  
606 overall level of arousal should have widespread but modality- and context-specific  
607 impact on sensory processing and behaviour (Aston-Jones and Cohen, 2005; McGinley  
608 et al., 2015b), the desynchronization of local sensory neural populations could be  
609 largely unrelated to, and take place on top of, those global changes (Beaman et al.,  
610 2017).

611 Such rather local and modality-specific changes in desynchronization have  
612 been assumed to arise from both thalamo- and cortico-cortical feedback connections  
613 that represent the allocation of selective attention (Harris and Thiele, 2011; Zagha et  
614 al., 2013; Zagha and McCormick, 2014). More precisely, glutamatergic projections  
615 between thalamus, prefrontal, and sensory cortical areas might shape the local net  
616 degree of inhibition in populations of sensory neurons via AMPA and NMDA receptors  
617 and hence influence time-varying local desynchronization. In fact, contingent on the  
618 specific task structure, selective attention increases desynchronization in neurons with  
619 stimulus-related receptive fields but also across a broader range of task-relevant  
620 neurons (Cohen and Maunsell, 2009, 2011). In keeping with this, desynchronization  
621 over auditory but not visual cortical areas predicted sensory processing and  
622 performance (Fig. 6). A next step would thus be to combine the present setup for  
623 desynchronization–dependent stimulation with manipulations of selective attention.  
624 Additionally, future studies might combine single-cell and macroscopic recordings of  
625 brain activity with either the monitoring of neurotransmitter release or targeted  
626 pharmacological interventions. In the present design we were unable to directly test  
627 an involvement of specific neuromodulators in variations of E/I balance and the  
628 generation of desynchronization states. Noradrenergic and cholinergic  
629 neuromodulation however, have been suggested as a candidate mechanism  
630 underlying such dynamics (Froemke, 2015).

631 All things considered, the involvement of two partially related mechanisms in  
632 the concomitant generation of desynchronization and arousal states appears likely. On  
633 the one hand, desynchronization states presumably are shaped by feedback  
634 connections that could result from fluctuations in selective attention (Harris and Thiele,  
635 2011). On the other hand, pupil-linked arousal states at least partially hinge on varying  
636 levels of LC–NE activity (Joshi et al., 2016; Reimer et al., 2016) which are propagated via  
637 vast projections towards most regions of cortex and which might be related to overall  
638 changes in the availability of cognitive resources.

639 If local cortical desynchronization and arousal indeed originate from two  
640 distinct processes that both entail functional and behavioural relevance, they should  
641 not only have differential effects on the processing of sensory information but also on  
642 perceptual performance — which is what we observed here, as discussed next.

643

644 *Sensory processing is distinctly affected by desynchronization and arousal states*

645 Desynchronized cortical states have previously been associated in the rodent with  
646 enhanced encoding of auditory stimuli (Marguet and Harris, 2011), more reliable  
647 neural responses (Pachitariu et al., 2015), and improved perceptual performance

648 (Beaman et al., 2017). Instead, when optogenetically inducing synchronization,  
649 perception is impaired (Nandy et al., 2019). Conversely, arousal been linked to  
650 increased sensory processing of visual stimuli in mice (Neske and McCormick, 2018)  
651 and humans (Gelbard-Sagiv et al., 2018). However, perceptual performance was found  
652 to be highest at either intermediate (McGinley et al., 2015a; Neske and McCormick,  
653 2018) or maximum arousal levels (Gelbard-Sagiv et al., 2018).

654 In the current study, desynchronization and arousal had clearly dissociable  
655 effects on sensory processing and behaviour at the single-trial level. First, phase-locked  
656 responses were strongest following intermediate levels of pre-stimulus  
657 desynchronization (Fig. 4). Strikingly, this relationships of desynchronization and  
658 sensory processing was mimicked by perceptual performance: Intermediate  
659 desynchronization led to optimal response criterion and response speed, hence  
660 yielding minimally biased and fastest performance (Fig. 5). Similarly, sensory-evoked  
661 gamma power increased with pre-stimulus auditory cortical desynchronization and  
662 showed a trend to saturate at intermediate levels. Second, pre-stimulus levels of pupil-  
663 linked arousal did only substantially affect sensory-evoked activity in the alpha band  
664 but not in low frequencies and were linked to perceptual sensitivity.

665 Of note, the described tri-fold association of desynchronization, stimulus-  
666 evoked activity, and response criterion is generally in accordance with a number of  
667 recent studies researching the influence of pre-stimulus oscillatory power on  
668 perceptual decisions. Generally, pre-stimulus power in the EEG has been found to bias  
669 choice behaviour (Kayser et al., 2016). More specifically, however, alpha power (8–12  
670 Hz) prior to stimulus onset has been tightly linked to changes in response criterion and  
671 confidence (Iemi et al., 2017; Samaha et al., 2017; Wöstmann et al., 2018). Pre-stimulus  
672 alpha power is hypothesized to represent changes in baseline excitability, linking it to  
673 response criterion following an inverted u-shaped relationship (Rajagovindan and  
674 Ding, 2011; Kloosterman et al., 2019). These previous findings and the here reported  
675 connection of desynchronization and response criterion might at least partially trace  
676 back to the same underlying mechanism: that is, task- and attention-specific input to  
677 sensory cortical regions via efferent projections leading to a change in net inhibition.

678 However, only EEG entropy but not oscillatory power was linked to perceptual  
679 performance. One reason behind this pattern of results potentially lies in the different  
680 contributions both measures receive from time-domain EEG recordings. While alpha  
681 power is commonly approximated using a Fourier transform that quantifies the energy  
682 of periodic signal fluctuations, EEG entropy receives contributions from periodic as  
683 well as aperiodic signal parts. Thus, EEG entropy potentially poses a more sensitive  
684 proxy of underlying neural processes than oscillatory power and explains more  
685 behavioural variance. Additionally, the task employed in the present study asked  
686 participants to integrate sensory evidence presented on a given trial into a reference  
687 frame of several tones. This approach differs from commonly used paradigms in the  
688 context of pre-stimulus alpha power which typically present stimuli close to the  
689 perceptual threshold in simple detection paradigms (e.g., Iemi et al., 2017). This  
690 difference in experimental tasks could further explain the irrelevance of oscillatory  
691 power to behaviour in the present dataset.

692 Furthermore, although both our present measures of brain state, EEG entropy  
693 and pupil size, were positively associated with stimulus-related EEG activity, they  
694 affected phase-locked and non-phase-locked brain responses as well as behaviour in

695 distinct ways (see Fig. 6a). Be reminded, however, that all effects on behaviour and  
696 stimulus-related activity were not obtainable when replacing auditory entropy with  
697 measures of auditory oscillatory power or with visuo-occipital entropy instead, which  
698 underlines their specificity.

699 Effectively, desynchronization and arousal might interact separately with the  
700 two, long-debated building blocks of sensory evoked responses: phase resetting of  
701 low-frequency oscillations and additive low-frequency activity (Shah et al., 2004;  
702 Sauseng et al., 2007). The positive link between phase-locked responses and  
703 desynchronization replicates previous findings from our group (Waschke et al., 2017)  
704 and, combined with the observation of maximum phase coherence following  
705 intermediate desynchronization, indicates enhanced early processing of auditory  
706 information. Tones presented into states of intermediate desynchronization thus led  
707 to a stronger phase-reset.

708

709 *Auditory cortical desynchronization and pupil-linked arousal differentially impact*  
710 *performance*

711 Importantly, the dissociation in neural sensory processing parallels a dissociation in  
712 behaviour. First, and analogous to the precision of sensory encoding which was  
713 highest at intermediate desynchronization levels, responses were least biased  
714 following intermediate desynchronization states. This striking parallel in neural and  
715 behavioural results cautiously suggests a change in the precision of representations  
716 that depends on the current desynchronization state. Second, the impact of arousal on  
717 post-stimulus alpha power and perceptual sensitivity, in the light of earlier  
718 interpretations (Voigt et al., 2018) proposes a similar mechanism: in addition to a  
719 clearer early representation of sensory information, intermediate arousal might  
720 optimize the integration of such a representation into an existing reference frame. This  
721 integration likely involves cortico-cortical feedback connections (Tallon-Baudry and  
722 Bertrand, 1999) and is essential to allow sensitive perceptual decisions. A different  
723 experimental design that allows the direct investigation of the proposed mechanisms  
724 represents a crucial next step to understanding the specific functioning of perceptually  
725 relevant brain states on the level on sensory neurons.

726 However, the relationship of arousal and perceptual performance takes a  
727 different shape than the respective link to sensory evoked activity might have  
728 suggested. While arousal covaried monotonically with post-stimulus activity in the  
729 alpha band (and in a statistically non-significant way also in low frequencies, 1–8 Hz),  
730 sensitivity was highest at intermediate levels of arousal, testimony to the classic  
731 Yerkes–Dodson law. A possible concern might be that we did not sample the state  
732 space of pupil-linked arousal in its entirety and hence ended up with a distribution that  
733 only captures the lower half of an underlying inverted u (Faller et al., 2019), resulting  
734 in a positive linear relationship between pupil-linked arousal and post-stimulus low-  
735 frequency power. The effect of arousal on sensitivity however did follow an inverted u-  
736 shape, suggesting that we indeed sampled a whole range of arousal states.

737 Additionally, a number of previous observations do in fact match this seeming  
738 disarray of stimulus-related activity (increasing monotonically with arousal) and ideal  
739 performance (depending quadratically on arousal). First, relatively highest levels of  
740 responsiveness in auditory cortical neurons overall can entail the loss of response

741 specificity crucial for precise encoding and perception (Otazu et al., 2009). Second, and  
 742 in line with this rationale, over-amplified responses to auditory stimuli have been  
 743 linked to age-related decreases of cortical inhibition (Herrmann et al., 2018a). States of  
 744 high arousal could thus in principle lead to a similar process of over-amplification and  
 745 hence prove detrimental to sensory encoding and perception. Third, a recent  
 746 experiment researching the impact of arousal on visual processing in mice yielded a  
 747 highly similar pattern of results (Neske and McCormick, 2018). Neske & McCormick  
 748 (2018) highlight the role of noradrenergic projections which might transmit task-  
 749 related activity most efficiently at intermediate arousal levels (Aston-Jones and Cohen,  
 750 2005).

751

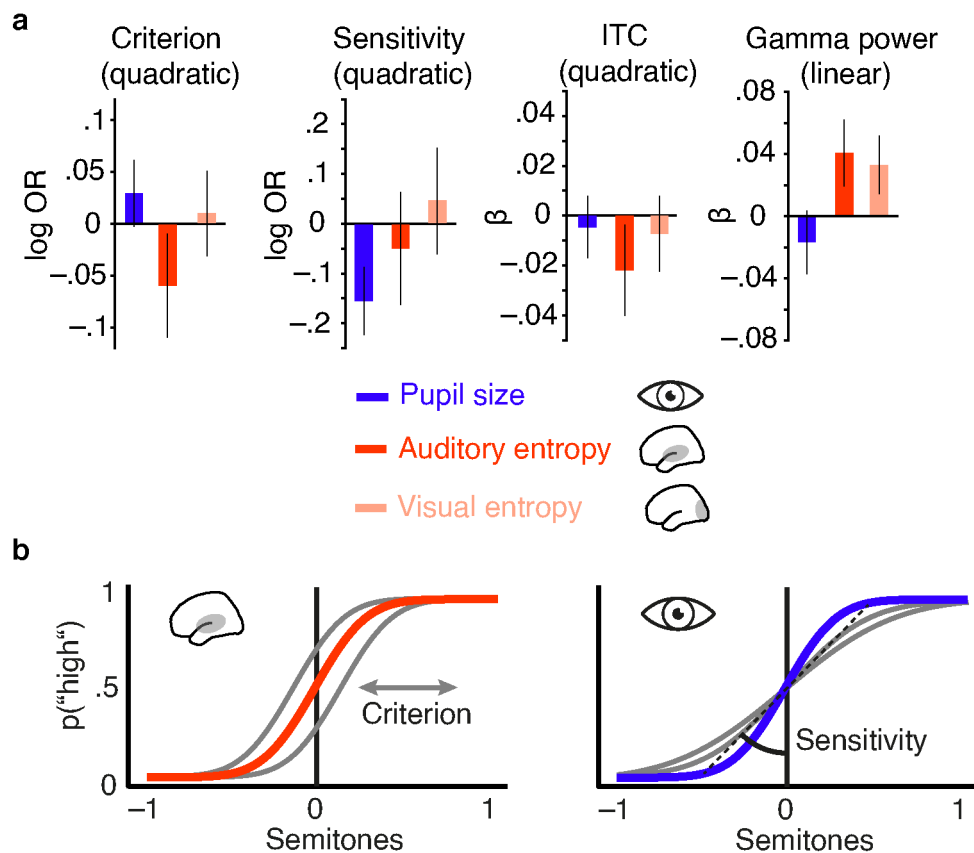

752

753 **Figure 6. Distinct effects of local desynchronization (i.e., auditory entropy) and**  
 754 **global arousal (i.e., pupil size) (a)** Effect sizes (fixed effects, with 95-% confidence  
 755 intervals) for the quadratic relationships of criterion and sensitivity with pupil size  
 756 (blue), auditory cortex entropy (red) and visual cortex entropy (pale pink). Similarly for  
 757 the quadratic relationship of pupil size, auditory cortex entropy, and visual cortex  
 758 entropy with ITC and linear relationships with stimulus-related gamma power. **(b)**  
 759 Illustrating the quadratic influence of entropy on response criterion (left panel) and  
 760 pupil size on sensitivity (right panel) by means of an optimal psychometric function  
 761 (red vs. blue) and non-optimal ones (grey).

762 The following figure supplements are available for figure 6:

763 **Figure 6 supplement 1.** Comparison of results from different brain-behaviour  
 764 models.

765

766 *Two interrelated systems of local and global brain state jointly shape perception*

767 We here have presented evidence for a joint role of local cortical desynchronization  
768 and arousal in the formation of brain states optimal for perceptual performance. The  
769 data are commensurate with a model where, on the one hand, arousal shapes global  
770 brain states via afferent noradrenergic projections and predominantly influences  
771 sensitivity. Conversely, we see local cortical desynchronization in task-related sensory  
772 areas to generate local states via attention-dependent feedback connections and to  
773 impact response criterion and speed.

774 To facilitate future research and offer testable hypotheses we intend to leave  
775 the reader with some speculations: How could those two mechanisms find an  
776 implementation in populations of task-involved sensory neurons? It has been  
777 suggested that the shared variability of neuronal populations and its impact on the  
778 responses of single neurons are shaped by an additive and a multiplicative source of  
779 variation in neural gain (Arieli et al., 1996; Schölvinck et al., 2015). Whereas a  
780 multiplicative gain factor would lead to an overall change in tuning width, an additive  
781 factor could create an offset which is believed to differ between neurons (Lin et al.,  
782 2015). Instantaneous fluctuations of cortical activity, or local cortical  
783 desynchronization, are believed to have an additive effect on evoked responses (Arieli  
784 et al., 1996). Furthermore, arousal-related LC–NE activity exerts a multiplicative  
785 influence on the tuning of sensory neurons, which has been suggested to entail  
786 relatively sharper tuning curves (Mather et al., 2016). However, recent findings  
787 challenge this view by showing pupil-linked arousal-related broadening of sensory  
788 neural tuning curves (Lin et al., 2019). Additionally, it is unlikely that either additive or  
789 multiplicative factors alone are the sole source of variability in stimulus-related activity  
790 and behaviour (Lin et al., 2015). However, the present data allow the testable  
791 prediction that selective attention and desynchronization primarily exert an additive  
792 influence on neural gain, while LC–NE activity and arousal impact neural gain in a  
793 multiplicative fashion.

794 In sum, the present data provide evidence that, at the single-trial level in  
795 humans, desynchronization in sensory cortex (expressed as EEG entropy) and pupil-  
796 linked arousal differentially impact sensory and perceptual processes, but jointly  
797 optimise sensory processing and performance.

798

799 Materials and Methods

800 *Participants:* 25 participants (19–31 years, mean age 24.6 years,  $\pm$  3.5 years SD; 10 male)  
801 with self-reported normal hearing took part in the experiment. We did not perform a  
802 formal power analysis. Importantly, all analyses were based on within-subject effects.  
803 Thus, we aimed for a high number of trials per subject ( $N > 400$ ) to minimize within-  
804 subject measurement uncertainty (Baker et al., 2019). Participants gave written  
805 informed consent and were financially compensated. None of the participants  
806 reported a history of neurological or otological disease. The study was approved by the  
807 local ethics committee of the University of Lübeck and all experimental procedures  
808 were carried out in accordance with the registered protocol.

809 *Stimulus material:* Sets of seven pure tones ( $\pm$ 3 steps around 1 kHz; step sizes  
810 determined individually, 100 ms duration, 10 ms rise and fall times, sampled at 44.1  
811 kHz) for the main experiment and an additional set of 7 pure tones for the auditory  
812 localizer task were created using custom Matlab® code (R2017a; MathWorks, Inc.,  
813 Natick, MA). Initial stimulus frequencies consisted of six steps ( $\pm$ 0.27,  $\pm$ 0.2, and  $\pm$ 0.14  
814 semitones) around the median frequency (1 kHz) but were adjusted during an  
815 individual tracking procedure described below. Stimuli were presented via air  
816 conducting in-ear head phones (EARTONE 3A), Psychtoolbox and a low latency audio  
817 card (RME Audio). All stimuli were presented perfectly audible at a comfortable  
818 loudness level approximating 60 dB SPL.

819 *General procedure:* Participants were seated in a quiet room in front of a computer  
820 screen. First, they completed an auditory localizer task. Second, participants practiced  
821 the main task where, in every trial, they compared one tone against the set of seven  
822 tones regarding its pitch and difficulty was adjusted to keep performance at  
823 approximately 75 % correct. Finally, participants performed 10 blocks of pitch  
824 discrimination against an implicit standard (the median pitch, 1 kHz) while tone  
825 presentation was triggered by the detection of high or low desynchronization states  
826 as outlined below.

827 *Auditory localizer task:* Participants listened to 350 pure tones (6 standards, range,  
828 1000–1025 Hz; one oddball at 1050 Hz) separated by inter-stimulus intervals (ISIs)  
829 between 1 s and 1.4 s (uniformly distributed). Their task was to detect and count high  
830 pitch oddballs (1050 Hz, 50 tones). No overt responses were given during the  
831 uninterrupted presentation of tones.

832 *Main experiment:* During each trial, participants were presented with one tone out of  
833 the same set of seven pure tones (range 1000–1025 Hz) and had to decide whether the  
834 presented tone was either high or low in pitch with regard to the whole set of stimuli.  
835 In other words, participants implicitly compared each incoming tone to the median  
836 frequency in the tone set (i.e., 1000 Hz; Johnson, 1949). To hold task difficulty  
837 comparable across individuals, up to four rounds of individual tracking (50 trials each)  
838 were carried out where the width of the pitch distribution was adjusted depending on  
839 performance after each round. Precisely, the width of the pitch distribution was  
840 increased (or decreased) if percentage correct was below 70 % (or above 80 %,  
841 respectively). The set of stimuli used during the last round of the tracking procedure  
842 was also used during the main experiment.

843 *Pitch discrimination task:* Participants were asked to indicate after each tone whether it  
844 was high or low in pitch relative to the whole set of stimuli by pressing one of two

845 buttons of a response box (The Black Box Toolkit). Button orientation was reversed for  
846 13 out of 25 participants. They were instructed to answer as fast and as accurate as  
847 possible as soon as the tone had vanished and the response screen had appeared. No  
848 feedback was given regarding their performance. A grey fixation cross was presented  
849 in the middle of the screen throughout the whole experiment which flickered for one  
850 second if participants failed to give a response within 2 seconds after stimulus offset.  
851 Participants performed 60 trials per stimulus levels, resulting in 420 trials split up into  
852 10 blocks of 42 trials each. Every block comprised 6 repetitions of each stimulus level  
853 in random order. Note that since the exact time point of stimulus presentation was  
854 determined depending on current brain states as identified by the real-time approach  
855 outlined below, the average tone-to-tone interval varied between individuals ( $9.14 \pm$   
856  $1.04$  s; min = 8.28 s, max = 12.32 s). Visual presentation and recording of responses was  
857 controlled by Psychtoolbox.

858

859 *Data recording and streaming:* While participants were seated in a dimly lit, sound  
860 attenuated booth, EEG signals were measured with a 64-channel active electrode  
861 system (actichamp, BrainProducts, Germany). Electrodes were arranged according to  
862 the international 10-20 system and impedances were kept below 10 k $\Omega$ . Data were  
863 sampled at 1kHz, referenced to electrode TP9 (left mastoid), and recorded using  
864 Labrecorder software, part of the Lab Streaming Layer (LSL; Kothe, 2014), also used to  
865 create a stream of EEG data, accessible in real-time.

866 Additionally, eye blinks were monitored and pupil size was recorded by tracking  
867 participants' right eye at 500 Hz (Eyelink 1000, SR Research). Pupil data was recorded  
868 using Eyelink software on a separate machine but at the same time streamed via a  
869 TCP/IP connection to the personal computer that was used for EEG recording, brain-  
870 state classification, and stimulus presentation. All recorded data was thus available on  
871 one machine.

872 *Spatial filtering and source localization:* To focus on EEG activity from auditory cortices,  
873 a spatial filter was calculated based on the data from the auditory localizer task of each  
874 participant excluding oddball trials. After re-referencing to the average off all channels,  
875 we applied singular value decomposition based on the difference between a signal  
876 covariance matrix (estimated on EEG data from 0–200 ms peristimulus) and a noise  
877 covariance matrix (-200–0 ms peristimulus). This approach resulted in a 64x64 matrix  
878 of eigenvalues and the elements of the first eigenvector were used as filter weights (for  
879 similar approaches see de Cheveigne & Simon, 2008; Herrmann, Maess, & Johnsrude,  
880 2018b). Matrix multiplication of incoming EEG signals with the spatial filter weights  
881 resulted in one virtual EEG channel which largely reflected activity from auditory  
882 cortical regions.

883 To validate this approach, we source localized the same EEG data that was used  
884 to construct the signal covariance matrix. To this end, lead fields were computed based  
885 on a boundary element method (BEM) template and default electrode locations.  
886 Routines from the fieldtrip toolbox (Oostenveld et al., 2011) and custom code were  
887 used to calculate the sLORETA inverse solution (Pascual-Marqui, 2002) which was  
888 projected on to the pial surface of a standard structural template (MNI). Arbitrary  
889 source strength values were masked at 70 % of the maximum.

890



891 *Entropy calculation:* We computed weighted permutation entropy (WPE) of spatially  
 892 filtered EEG-signals in a moving window fashion. WPE is an extension to permutation  
 893 entropy (PE) which was first developed by Bandt and Pompe (2002) that considers the  
 894 amplitude fluctuations of time-series data (Fadlallah et al., 2013) and its calculation is  
 895 outlined below.

896 In short, WPE approximates the complexity or desynchronization of any neural time-  
 897 series via three steps: First, recorded samples (here: microvolts) are transformed into  
 898 symbolic patterns of a predefined length and distance (equation 1). Second, the  
 899 probability of occurrence of those patterns within a snippet of data is used to calculate  
 900 one entropy value (Bandt and Pompe, 2002). Finally, the amplitude information which  
 901 is lost during the mapping into symbolic space is partially reintroduced by weighing  
 902 each patterns probability of occurrence by the relative variance of its corresponding  
 903 neural data (equations 3 & 4; Fadlallah et al., 2013).

904 In detail, consider the time-series  $\{\mathbf{x}t\}_{t=1}^T$  and a representation incorporating its time  
 905 delayed sampling  $X_j^{m,\tau} = \{x_j, x_{j+\tau}, \dots, x_{j+(m-1)\tau}\}$  for  $j = 1, 2, \dots, T - (m - 1)\tau$   
 906 where  $m$  is the so called "motif length" and  $\tau$  its "time delay factor". The use of both  
 907 results in a subdivision of the time series into  $N = T - (m - 1)\tau$  sub-vectors. Each of  
 908 those  $N$  sub-vectors is mapped into symbolic space by replacing every element, with  
 909 its rank in the respective sub-vector. Note that the total number of possible motifs ( $m!$ )  
 910 is limited by the motif length  $m$ . The probability of occurrence for all possible motifs  
 911  $\{\pi_i^{m,\tau}\}_{i=1}^{m!}$  called  $\delta$ , which additionally is weighted by  $w_j$ , can be defined as:

$$p_w(\pi_i^{m,\tau}) = \frac{\sum_{j \leq N} \mathbf{1}_{u:\text{type}(u)=\pi_i}(X_j^{m,\tau}) \cdot w_j}{\sum_{j \leq N} \mathbf{1}_{u:\text{type}(u) \in \delta}(X_j^{m,\tau}) \cdot w_j} \quad (1)$$

912 Note that *type* represents the mapping into symbolic space. Let us furthermore and for  
 913 simplicity express the weighted occurrence probability of motifs as  $P_w = p_w(\pi_i^{m,\tau})$ .  
 914 The weighting of probabilities with weight  $w_j$  is achieved by calculating the variance of  
 915 sub-vectors. Therefore we define the arithmetic mean of  $X_j^{m,\tau}$  as:

$$\bar{X}_j^{m,\tau} = \frac{1}{m} \sum_{k=1}^m (x_{j+(k-1)\tau}) \quad (2)$$

916 Each weight value hence is represented by:

$$w_j = \frac{1}{m} \sum_{k=1}^m (x_{j+(k-1)\tau} - \bar{X}_j^{m,\tau})^2 \quad (3)$$

917 We can finally compute WPE as the Shannon entropy of:

$$H(m, \tau) = - \sum_{i:\pi_i^{m,\tau} \in \delta} P_w \log P_w \quad (4)$$

918 Since the exact choice of motif length and distance influences the final entropy  
 919 estimate we relied on recommendations from modelling work and earlier practice  
 920 (Riedl et al., 2013; Waschke et al., 2017) by setting the motif length to 3 and the distance  
 921 to 1 (number of samples). To ensure approximation acuity but to retain a high time-  
 922 resolution, a 200-samples window was moved along the EEG signal in steps of 10  
 923 samples, resulting in an entropy sampling rate of 100 Hz.

924 *Real-time brain-state classification and stimulus triggering:* Neural desynchronization in  
925 auditory cortical regions was estimated by buffering the EEG signal into Matlab®, re-  
926 referencing to the average of all channels, applying the individual spatial filter and  
927 calculating a time-resolved version of WPE (for details see above).

928 The resulting entropy time-series was used to generate online a distribution of  
929 entropy values. Importantly, this distribution was updated constantly such that it never  
930 depended on values older than 30 seconds. This way, changes in neural  
931 desynchronization on longer time-scales were excluded and, instead of a strictly  
932 bimodal distribution, the whole desynchronization state space was sampled.  
933 Accordingly, trials with stimuli presented at essentially all levels of absolute  
934 desynchronization were obtained (see Figure 2). Desynchronization states were defined  
935 as a minimum of 10 consecutive entropy samples (100 ms) higher or lower than 90% of  
936 the current distribution. Elsewhere in the paper, we will refer to these as high and low  
937 states, respectively.

938 Organized activity in the EEG signal such as evoked responses or eye blinks  
939 results in neural synchronization and thus in a drastic reduction in entropy. Although  
940 the contribution of eye blinks to the online-analysed EEG signal was minimized by the  
941 spatial filter approach, we ensured that no periods containing eye blinks distorted the  
942 classification of desynchronization states. To this end, pupil data was read out in real-  
943 time and whenever a blink was detected by the eye tracker or pupil size was close to  
944 zero, a “mute” window of 1 second was initiated where incoming EEG data were not  
945 considered further. EEG signals immediately following a blink thus were excluded from  
946 both, entering the desynchronization distribution and from being classified as a high  
947 or low state.

948 Whenever a high or low state was detected, a new trial started with the  
949 presentation of a pure tone after which the response screen was shown and  
950 participants gave their response. Note that each tone was presented equally often  
951 during high and low states (30 times, yielding 210 trials per state, or 420 trials in total).

952 *Pre-processing of pupil data:* First, the inbuilt detection algorithm was used to locate  
953 blinks and saccades before pupil data were aligned with EEG recordings. Second,  
954 signal around blinks was interpolated using a cubic spline before low-pass filtering  
955 below 20 Hz and down-sampling to 50 Hz. Third, data were split up into trials (-2.5–3  
956 seconds peristimulus). Finally, single trial time-courses of pupil size were visually  
957 inspected and noisy trials ( $1.3\% \pm 1.6\%$ ) were removed. For visualization purposes,  
958 pupil signals were expressed in percentage of the pre-stimulus maximum within a  
959 participant (-.5–0 s peristimulus). Z-scored pupil data was used as a predictor in brain-  
960 brain as well as brain-behaviour models. Due to technical difficulties, data from one  
961 subject had to be excluded from further analyses.

962 *EEG offline pre-processing:* EEG pre-processing and analyses were carried out using the  
963 Fieldtrip and EEGLAB toolboxes (Delorme and Makeig, 2004; Oostenveld et al., 2011)  
964 as well as custom code in Matlab® 2017a. First, and as a preparation for independent  
965 component analysis (ICA) only, data were re-referenced to the average of all channels,  
966 bandpass filtered between 1 and 100 Hz, subsequently down-sampled to 300 Hz, and  
967 split up into 2 seconds long epochs. Rare events like breaks between experimental  
968 blocks and noisy channels were excluded based on visual inspection. Second, data  
969 were decomposed into independent components using EEGLAB’s runica algorithm.

970 Visual inspection of topographies, time-courses, power spectra, and fitted dipoles  
971 (dipfit extension) was used to reject artefactual components representing eye blinks,  
972 lateral eye movements, heart rate, muscle and electrode noise. Third, raw, un-  
973 processed data were loaded, previously detected noisy channels were removed and  
974 data were re-referenced to the average of all channels. ICA weights of non-artefactual  
975 components were applied to those data before excluded channels were interpolated.  
976 Finally, ICA-cleaned data were band-pass filtered between .5 and 100 Hz using a zero-  
977 phase finite impulse response filter and subsequently epoched between -2.5 and 3  
978 seconds peristimulus. Single trials were visually inspected and rejected in case of  
979 excessive noise. On average 1 channel ( $\pm 1$  channel,  $M \pm SD$ ), 68.9% ( $\pm 7\%$ ) of all  
980 components, and 1.4% ( $\pm 1.6\%$ ) of all trials were rejected.

981 *EEG time-frequency domain analyses:* Single trial complex-valued Fourier  
982 representations of the data were obtained through the convolution of cleaned and  
983 spatially filtered time-courses with frequency adaptive Hann-tapers (4 cycles) with a  
984 time-resolution of 100 Hz. Power from 1 to 40 Hz (in .5 Hz steps) and from 40 to 70 Hz  
985 (14 exponentially increasing steps) was calculated by squaring the modulus of the  
986 Fourier spectrum and was expressed as change in Decibel (dB) relative to average  
987 power in the whole trial (-1 to 1.5 s peristimulus).

988 Additionally, we calculated inter-trial phase coherence (ITC;  $0 \leq ITC \leq 1$ ) and  
989 thus divided Fourier representations by their magnitude and averaged across trials  
990 before computing the magnitude of the average complex value. Importantly, since,  
991 ITC is only defined for a set of multiple trials but not for single trials, we computed the  
992 single-trial measure of jackknife-ITC (jITC; Richter, Thompson, Bosman, & Fries, 2015;  
993 Wöstmann et al., 2018). In short, jITC of one trial is defined as the ITC of all trials but the  
994 one in question. Note that a trial highly phase-coherent with all others will result in a  
995 relatively low value of jITC, reversing the intuitive interpretation of ITC. In the  
996 remainder of this paper, we will thus use the term *single-trial phase coherence* when  
997 referring to  $1-jITC$ .

998 *Control analyses:* To test the topographical specificity of EEG entropy, we averaged the  
999 re-referenced but otherwise raw EEG signal over seven visuo-occipital channels (PO3,  
1000 PO4, PO7, PO8, POz, O1, O2). Note that this average of a channel selection (all seven  
1001 visuo-occipital channels receiving equal weight in the average, while other channels  
1002 effectively received weight 0) is conceptually not different from the way the more  
1003 sophisticated, pilot-experiment-based auditory spatial filter was calculated.  
1004 Subsequently, we calculated EEG entropy of this occipital cluster in the exact same way  
1005 outlined above for auditory cortical areas. The resulting entropy signal was used to  
1006 repeat all analyses of stimulus-related activity and behaviour. Precisely, mixed models  
1007 of ITC, stimulus-related power and behaviour were re-run with visuo-cortical entropy.  
1008 The performance of those models was evaluated by comparing them to the models  
1009 based on auditory cortical entropy.

1010

1011 Statistical analyses

1012 *General approach:* Trial-wise brain-behaviour and brain-brain relationships were  
1013 analysed using (generalized) linear mixed-effects models (see below). We used single  
1014 trial estimates of pre- and post-stimulus brain activity as well as binary decisions (“high  
1015 vs. “low”) as dependent variables. Pre-stimulus entropy and pupil size served as  
1016 predictors. To allow for an illustrative presentation of single subject data, dependent  
1017 variables were binned based on predictor variables (see Fig. 3). Note that both EEG  
1018 signals and behaviour were modelled based on single trial measures of entropy and  
1019 pupil size, without dichotomizing them into high and low states. Importantly, a  
1020 contrast between high and low states (for entropy and pupil size) as well as binning  
1021 was used for visualization only (see Figures 3 and 4) and was not part of any statistical  
1022 analyses reported here. However, single subject fits across bins (of varying number;  
1023 varying the number of bins between 3 and 7) qualitatively replicated effects of single-  
1024 trial models.

1025 *Brain-behaviour relationships:* As the main interest of this study lay in the influence of  
1026 pre-stimulus desynchronization and pupil-linked arousal on perceptual sensitivity and  
1027 response criterion, we combined a generalized linear-mixed-effects model approach  
1028 with psychophysical modelling: single trial responses (high vs. low) of all participants  
1029 were modelled as a logistic regression in R (R Core Team, 2018) using the lme4 package  
1030 (Bates et al., 2015) and a logit link function. The main predictors used in the model were  
1031 (1) the normalized pitch of presented tones (with respect to the median frequency, 7  
1032 levels), (2) pre-stimulus entropy (averaged between -.2 and 0 s peristimulus) and (3)  
1033 pre-stimulus pupil size (averaged between -.5 and 0 s peristimulus). Pre-stimulus  
1034 entropy and pupil size entered the model as both linear and quadratic predictors  
1035 allowing us to test for non-linear relationships. We additionally included baseline  
1036 entropy of each trial (3 seconds pre-stimulus) as a covariate to account for slow  
1037 fluctuations in average entropy across the duration of the experiment. Note that such  
1038 an approach is not only in line with current recommendations in statistical literature  
1039 (Senn, 2006) but also comparable to the common inclusion of polynomials in models  
1040 of functional imaging data (Kay et al., 2008). Additionally, a recent study highlighted  
1041 the superiority of such an approach compared to traditional baseline subtraction in  
1042 the context of EEG data (Alday, 2019). To control for the influence of task duration, trial  
1043 number was added as a regressor of no interest.

1044 Note that, in the resulting model, a main effect of pitch corresponds to the  
1045 presence of psychometric response behaviour itself (probability of “high” responses  
1046 across pitch levels), a main effect of another predictor (e.g. pupil size) represents a shift  
1047 in response criterion, and an interaction of pitch and another predictor depicts a  
1048 change in the slope of the psychometric function, i.e. a change in sensitivity. Of note,  
1049 we refrain from interpreting the effects of covariates such as trial number or baseline  
1050 entropy, as is good practice. For a similar approach and argument see Alday (2019).

1051 Response times were measured relative to the offset of the presented tone  
1052 and analysed irrespective of response outcome (correct vs. incorrect). To eliminate the  
1053 impact of outliers, response times below .2 and above 2 seconds were excluded from  
1054 further analyses (Ratcliff, 1993). Effects of pre-stimulus desynchronization and arousal  
1055 on response speed (the inverse of response time, measured in 1/s) were analysed  
1056 within a linear mixed-effect model framework. Hence, single-trial measures of  
1057 response speed across all participants were considered as the dependent variable. This

1058 analysis approach allowed us to control for a number of other variables including trial  
1059 number and task ease by adding them as regressors to the model.

1060 *Brain–brain relationships:* To test the relationships between neural desynchronization  
1061 and pupil-linked arousal with ongoing brain activity as well as auditory evoked  
1062 responses we followed an analogous approach. Namely, different linear mixed-effects  
1063 models with pre-stimulus entropy and pupil size as predictors were fitted for (i) pre-  
1064 stimulus low (1–8 Hz) and (ii) high (40–70 Hz) frequency power as proxies of ongoing  
1065 activity. Similarly, different models were fitted for (i) post-stimulus (0–250 ms) single-  
1066 trial phase coherence (1–8 Hz), as well as (ii) low and (iii) high frequency total power as  
1067 measures of auditory evoked activity and stimulus processing (see Fig. 2a). Of note no  
1068 other covariates than baseline entropy used to model brain–behaviour relationships  
1069 were included since none explained any additional variance.

1070 *Model fitting:* We employed an iterative model fitting procedure, starting with an  
1071 intercept-only model, to arrive at the best fitting model (Alavash et al., 2018; Tune et  
1072 al., 2018).

1073 Fixed effects were added to the model one at a time and the change in model  
1074 fit was assessed using maximum likelihood estimation. An analogous procedure was  
1075 adopted for random effects after the best fitting fixed-effect-only model had been  
1076 determined. We re-coded single trial pitch by first subtracting the median pitch and  
1077 subsequently dividing by the new maximum, resulting in –1 and 1 for lowest and  
1078 highest pitch, respectively, and 0 as the midpoint. We z-scored all continuous variables  
1079 within participants. In the case of binary response behaviour we used generalized  
1080 linear mixed-effects models with a logit link function. For all other models we  
1081 employed linear mixed-effects as distributions of dependent variables were not found  
1082 to be significantly different from a normal distribution (all Shapiro–Wilk  $P$  values  $> .1$ ).  
1083  $P$  values for individual model terms were derived using the Wald z-as-t procedure  
1084 (Luke, 2017).

1085 As measures of effect size we report log odds ratio (log OR) for models of binary  
1086 response behaviour and regression coefficients  $\beta$  for all other models alongside their  
1087 respective standard errors (SE). A log OR of 0 indicates no effect for the regressor under  
1088 consideration. Bayes factors (BF) were calculated for the comparison of two models  
1089 with an equal number of terms that differed only in one predictor.

1090 To additionally offer an intuitive comparison of predictors' effects on behavior  
1091 we directly tested some important differences of model estimates using a Wald test. In  
1092 short, the Wald statistic puts the difference between two estimates from the same  
1093 model in relation to the standard error of that difference. The resulting test statistic  $Z$   
1094 (Bolker et al., 2009) can be used to test the null hypothesis of no difference between  
1095 the two estimates in a respective linear model.  $Z$ -values above and below  $\pm 1.96$ ,  
1096 respectively, were considered statistically significant.

1097 To evaluate the performance of the real-time desynchronization detection  
1098 algorithm described above, we re-calculated entropy (WPE) in the spatially filtered, un-  
1099 cleaned EEG signal to then compute subject-wise averages of entropy time-courses for  
1100 high state and low state trials, respectively. A series of paired t-test was used to  
1101 examine state differences across time. We adjusted  $p$ -values to control for the false  
1102 discovery rate (Benjamini and Hochberg, 1995).

1103

1104 **Data availability:** EEG data and pupillometry data are publicly available on the Open  
1105 Science Framework <https://osf.io/f9kzs/>

1106 **Code availability:** Custom computer code to reproduce all essential findings is  
1107 publicly available on OSF <https://osf.io/f9kzs/>

## 1108 References

- 1109 Alavash M, Tune S, Obleser J (2018) Modular reconfiguration of an auditory-control  
1110 brain network supports adaptive listening behavior. *bioRxiv*:409797.
- 1111 Alday PM (2019) How much baseline correction do we need in ERP research? Extended  
1112 GLM model can replace baseline correction while lifting its limits.  
1113 *Psychophysiology* Available at:  
1114 <https://onlinelibrary.wiley.com/doi/abs/10.1111/psyp.13451> [Accessed August  
1115 21, 2019].
- 1116 Arieli A, Sterkin A, Grinvald A, Aertsen A (1996) Dynamics of ongoing activity:  
1117 explanation of the large variability in evoked cortical responses. *Science* (New  
1118 York, NY) 273:1868–1871.
- 1119 Aston-Jones G, Cohen JD (2005) An Integrative Theory of Locus Coeruleus-  
1120 Norepinephrine Function: Adaptive Gain and Optimal Performance. *Annual*  
1121 *Review of Neuroscience* 28:403–450.
- 1122 Baker DH, Vilidaite G, Lygo FA, Smith AK, Flack TR, Gouws AD, Andrews TJ (2019) Power  
1123 contours: optimising sample size and precision in experimental psychology  
1124 and human neuroscience. *arXiv:190206122 [q-bio, stat]* Available at:  
1125 <http://arxiv.org/abs/1902.06122> [Accessed September 5, 2019].
- 1126 Bandt C, Pompe B (2002) Permutation entropy: a natural complexity measure for time  
1127 series. *Physical review letters* 88:174102.
- 1128 Bates D, Mächler M, Bolker B, Walker S (2015) Fitting Linear Mixed-Effects Models Using  
1129 lme4. *Journal of Statistical Software* 67:251–264.
- 1130 Beaman CB, Eagleman SL, Dragoi V (2017) Sensory coding accuracy and perceptual  
1131 performance are improved during the desynchronized cortical state. *Nature*  
1132 *communications* 8:1308.
- 1133 Benjamini Y, Hochberg Y (1995) Controlling the false discovery rate: a practical and  
1134 powerful approach to multiple testing. *Journal of the Royal Statistical Society B*  
1135 57:289–300.
- 1136 Carter ME, Yizhar O, Chikahisa S, Nguyen H, Adamantidis A, Nishino S, Deisseroth K, de  
1137 Lecea L (2010) Tuning arousal with optogenetic modulation of locus coeruleus  
1138 neurons. *Nat Neurosci* 13:1526–1533.
- 1139 Cohen MR, Maunsell JHR (2009) Attention improves performance primarily by  
1140 reducing interneuronal correlations. *Nature Neuroscience* 12:1594–1600.
- 1141 Cohen MR, Maunsell JHR (2011) Using Neuronal Populations to Study the Mechanisms  
1142 Underlying Spatial and Feature Attention. *Neuron* 70:1192–1204.
- 1143 Curto C, Sakata S, Marguet S, Itskov V, Harris KD (2009) A simple model of cortical  
1144 dynamics explains variability and state-dependence of sensory responses in  
1145 urethane-anesthetized auditory cortex. *J Neurosci* 29:10600–10612.
- 1146 de Cheveigne A, Simon JZ (2008) Denoising based on spatial filtering. *Journal of*  
1147 *Neuroscience Methods* 171:331–339.
- 1148 de Gee JW, Colizoli O, Kloosterman NA, Knapen T, Nieuwenhuis S, Donner TH (2017)  
1149 Dynamic modulation of decision biases by brainstem arousal systems. *eLife* 6  
1150 Available at: <http://elifesciences.org/lookup/doi/10.7554/eLife.23232>.
- 1151 Delorme A, Makeig S (2004) EEGLAB: an open source toolbox for analysis of single-trial  
1152 EEG dynamics including independent component analysis. *Journal of*  
1153 *Neuroscience Methods* 134:9–21.
- 1154 Ezzyat Y et al. (2018) Closed-loop stimulation of temporal cortex rescues functional  
1155 networks and improves memory. *Nature Communications* 9.
- 1156 Fadlallah B, Chen B, Keil A, Principe J (2013) Weighted-permutation entropy: A  
1157 complexity measure for time series incorporating amplitude information.  
1158 *Physical Review E* 87:022911.

- 1159 Faller J, Cummings J, Saproo S, Sajda P (2019) Regulation of arousal via online  
1160 neurofeedback improves human performance in a demanding sensory-motor  
1161 task. *PNAS*:201817207.
- 1162 Froemke RC (2015) Plasticity of Cortical Excitatory-Inhibitory Balance. *Annu Rev*  
1163 *Neurosci* 38:195–219.
- 1164 Gao R, Peterson EJ, Voytek B (2017) Inferring synaptic excitation/inhibition balance  
1165 from field potentials. *NeuroImage* 158:70–78.
- 1166 Gelbard-Sagiv H, Magidov E, Sharon H, Hendler T, Nir Y (2018) Noradrenaline  
1167 Modulates Visual Perception and Late Visually Evoked Activity. *Current*  
1168 *Biology*:1–11.
- 1169 Goard M, Dan Y (2009) Basal forebrain activation enhances cortical coding of natural  
1170 scenes. *Nature Neuroscience* 12:1444–1449.
- 1171 Haider B, Häusser M, Carandini M (2012) Inhibition dominates sensory responses in the  
1172 awake cortex. *Nature* 493:97–100.
- 1173 Haider B, McCormick DA (2009) Rapid Neocortical Dynamics: Cellular and Network  
1174 Mechanisms. *Neuron* 62:171–189.
- 1175 Harris KD, Thiele A (2011) Cortical state and attention. *Nature Reviews Neuroscience*  
1176 12:509–523.
- 1177 Herrmann B, Maess B, Johnsrude IS (2018a) Aging Affects Adaptation to Sound-Level  
1178 Statistics in Human Auditory Cortex. *The Journal of Neuroscience*:1489–17.
- 1179 Herrmann B, Maess B, Johnsrude IS (2018b) Aging Affects Adaptation to Sound-Level  
1180 Statistics in Human Auditory Cortex. *The Journal of Neuroscience*:1489–17.
- 1181 lemi L, Chaumon M, Crouzet SM, Busch NA (2017) Spontaneous Neural Oscillations Bias  
1182 Perception by Modulating Baseline Excitability. *The Journal of Neuroscience*  
1183 37:807–819.
- 1184 Jazayeri M, Afraz A (2017) Navigating the Neural Space in Search of the Neural Code.  
1185 *Neuron* 93:1003–1014.
- 1186 Johnson DM (1949) Generalization of a reference scale for judging pitch. *Journal of*  
1187 *Experimental Psychology* 39:316–321.
- 1188 Joshi S, Li Y, Kalwani RM, Gold JI (2016) Relationships between Pupil Diameter and  
1189 Neuronal Activity in the Locus Coeruleus, Colliculi, and Cingulate Cortex.  
1190 *Neuron* 89:221–234.
- 1191 Kay KN, David SV, Prenger RJ, Hansen KA, Gallant JL (2008) Modeling low-frequency  
1192 fluctuation and hemodynamic response timecourse in event-related fMRI.  
1193 *Hum Brain Mapp* 29:142–156.
- 1194 Kayser SJ, McNair SW, Kayser C (2016) Prestimulus influences on auditory perception  
1195 from sensory representations and decision processes. *Proceedings of the*  
1196 *National Academy of Sciences* 113:201524087.
- 1197 Kloosterman NA, de Gee JW, Werkle-Bergner M, Lindenberger U, Garrett DD,  
1198 Fahrenfort JJ (2019) Humans strategically shift decision bias by flexibly  
1199 adjusting sensory evidence accumulation Frank MJ, ed. *eLife* 8:e37321.
- 1200 Kothe C (2014) Lab Streaming Layer. Available at:  
1201 <https://code.google.com/archive/p/labstreaminglayer/>.
- 1202 Lee T-H, Greening SG, Ueno T, Clewett D, Ponzio A, Sakaki M, Mather M (2018) Arousal  
1203 increases neural gain via the locus coeruleus-noradrenaline system in younger  
1204 adults but not in older adults. *Nature Human Behaviour* 2:356–366.
- 1205 Lin I-C, Okun M, Carandini M, Harris KD (2015) The Nature of Shared Cortical Variability.  
1206 *Neuron* 87:644–656.
- 1207 Lin P-A, Asinof SK, Edwards NJ, Isaacson JS (2019) Arousal regulates frequency tuning  
1208 in primary auditory cortex. *Proc Natl Acad Sci USA*:201911383.
- 1209 Luke SG (2017) Evaluating significance in linear mixed-effects models in R. *Behavior*  
1210 *Research Methods* 49:1494–1502.



- 1211 Makeig S, Debener S, Onton J, Delorme A (2004) Mining event-related brain dynamics.  
1212 Trends in Cognitive Sciences 8:204–210.
- 1213 Marguet SL, Harris KD (2011) State-Dependent Representation of Amplitude-  
1214 Modulated Noise Stimuli in Rat Auditory Cortex. *Journal of Neuroscience*  
1215 31:6414–6420.
- 1216 Mather M, Clewett D, Sakaki M, Harley CW (2016) Norepinephrine ignites local hotspots  
1217 of neuronal excitation: How arousal amplifies selectivity in perception and  
1218 memory. *Behavioral and Brain Sciences* 39.
- 1219 McCormick DA (1989) Cholinergic and noradrenergic modulation of thalamocortical  
1220 processing. *Trends in Neurosciences* 12:215–221.
- 1221 McCormick DA, Pape H-C, Williamson A (1991) Actions of norepinephrine in the  
1222 cerebral cortex and thalamus: implications for function of the central  
1223 noradrenergic system. In: *Progress in Brain Research*, pp 293–305. Elsevier.  
1224 Available at: <https://linkinghub.elsevier.com/retrieve/pii/S0079612308638170>  
1225 [Accessed November 20, 2019].
- 1226 McGinley MJ, David SV, McCormick DA (2015a) Cortical Membrane Potential Signature  
1227 of Optimal States for Sensory Signal Detection. *Neuron* 87:179–192.
- 1228 McGinley MJ, Vinck M, Reimer J, Batista-Brito R, Zaghera E, Cadwell CR, Tolias AS, Cardin  
1229 JA, McCormick DA (2015b) Waking State: Rapid Variations Modulate Neural  
1230 and Behavioral Responses. *Neuron* 87:1143–1161.
- 1231 Murphy PR, Vandekerckhove J, Nieuwenhuis S (2014) Pupil-Linked Arousal Determines  
1232 Variability in Perceptual Decision Making. *PLoS Computational Biology* 10.
- 1233 Nandy A, Nassi JJ, Jadi MP, Reynolds J (2019) Optogenetically induced low-frequency  
1234 correlations impair perception. *eLife* 8.
- 1235 Neske GT, McCormick DA (2018) Distinct waking states for strong evoked responses in  
1236 primary visual cortex and optimal visual detection performance. *bioRxiv*  
1237 Available at: <http://biorxiv.org/lookup/doi/10.1101/437681> [Accessed February  
1238 18, 2019].
- 1239 Okun M, Steinmetz NA, Lak A, Dervinis M, Harris KD (2019) Distinct Structure of Cortical  
1240 Population Activity on Fast and Infralow Timescales. *Cerebral Cortex* 29:2196–  
1241 2210.
- 1242 Oostenveld R, Fries P, Maris E, Schoffelen J-M (2011) FieldTrip: Open source software  
1243 for advanced analysis of MEG, EEG, and invasive electrophysiological data.  
1244 *Computational intelligence and neuroscience* 2011:156869.
- 1245 Otazu GH, Tai L-H, Yang Y, Zador AM (2009) Engaging in an auditory task suppresses  
1246 responses in auditory cortex. *Nature Neuroscience* 12:646–654.
- 1247 Pachitariu M, Lyamzin DR, Sahani M, Lesica N a (2015) State-dependent population  
1248 coding in primary auditory cortex. *Journal of neuroscience* 35:2058–2073.
- 1249 Pakan JM, Lowe SC, Dylida E, Keemink SW, Currie SP, Coutts CA, Rochefort NL (2016)  
1250 Behavioral-state modulation of inhibition is context-dependent and cell type  
1251 specific in mouse visual cortex. *eLife* 5.
- 1252 Pascual-Marqui RD (2002) Standardized low-resolution brain electromagnetic  
1253 tomography (sLORETA): technical details. *Methods and findings in  
1254 experimental and clinical pharmacology* 24 Suppl D:5–12.
- 1255 Peixoto D, Verhein JR, Kiani R, Kao JC, Nuyujukian P, Chandrasekaran C, Brown J, Fong  
1256 S, Ryu SI, Shenoy KV, Newsome WT (2019) Decoding and perturbing decision  
1257 states in real time. *Neuroscience*. Available at:  
1258 <http://biorxiv.org/lookup/doi/10.1101/681783>.
- 1259 Pfeffer T, Avramiea A-E, Nolte G, Engel AK, Linkenkaer-Hansen K, Donner TH (2018)  
1260 Catecholamines alter the intrinsic variability of cortical population activity and  
1261 perception Summerfield C, ed. *PLOS Biology* 16:e2003453.

- 1262 Pinto L, Goard MJ, Estandian D, Xu M, Kwan AC, Lee S-H, Harrison TC, Feng G, Dan Y  
1263 (2013) Fast modulation of visual perception by basal forebrain cholinergic  
1264 neurons. *Nature Neuroscience* 16:1857–1863.
- 1265 R Core Team (2018) R: A Language and Environment for Statistical Computing.
- 1266 Rajagovindan R, Ding M (2011) From Prestimulus Alpha Oscillation to Visual-evoked  
1267 Response: An Inverted-U Function and Its Attentional Modulation. *Journal of*  
1268 *Cognitive Neuroscience* 23:1379–1394.
- 1269 Ratcliff R (1993) Methods for dealing with RT outliers. *Psychological Bulletin* 114:510–  
1270 532.
- 1271 Reimer J, Froudarakis E, Cadwell CR, Yatsenko D, Denfield GH, Tolias AS (2014) Pupil  
1272 Fluctuations Track Fast Switching of Cortical States during Quiet Wakefulness.  
1273 *Neuron* 84:355–362.
- 1274 Reimer J, McGinley MJ, Liu Y, Rodenkirch C, Wang Q, McCormick DA, Tolias AS (2016)  
1275 Pupil fluctuations track rapid changes in adrenergic and cholinergic activity in  
1276 cortex. *Nature Communications* 7 Available at:  
1277 <http://www.nature.com/articles/ncomms13289>.
- 1278 Renart A, de la Rocha J, Bartho P, Hollender L, Parga N, Reyes AD, Harris KD (2010) The  
1279 asynchronous state in cortical circuits. *Science (New York, NY)* 327:587–590.
- 1280 Richter CG, Thompson WH, Bosman CA, Fries P (2015) A jackknife approach to  
1281 quantifying single-trial correlation between covariance-based metrics  
1282 undefined on a single-trial basis. *NeuroImage* 114:57–70.
- 1283 Riedl M, Müller A, Wessel N (2013) Practical considerations of permutation entropy: A  
1284 tutorial review. *European Physical Journal: Special Topics* 222:249–262.
- 1285 Robbins TW (1997) Arousal systems and attentional processes. *Biological Psychology*  
1286 45:57–71.
- 1287 Sakata S (2016) State-dependent and cell type-specific temporal processing in auditory  
1288 thalamocortical circuit. *Scientific reports* 6:18873.
- 1289 Samaha J, Lemi L, Postle BR (2017) Prestimulus alpha-band power biases visual  
1290 discrimination confidence, but not accuracy. *Consciousness and Cognition*  
1291 54:47–55.
- 1292 Sarasso S, Boly M, Napolitani M, Gosseries O, Charland-Verville V, Casarotto S, Rosanova  
1293 M, Casali AG, Brichant JF, Boveroux P, Rex S, Tononi G, Laureys S, Massimini M  
1294 (2015) Consciousness and complexity during unresponsiveness induced by  
1295 propofol, xenon, and ketamine. *Current Biology* 25:3099–3105.
- 1296 Sauseng P, Klimesch W, Gruber WR, Hanslmayr S, Freunberger R, Doppelmayr M (2007)  
1297 Are event-related potential components generated by phase resetting of brain  
1298 oscillations? A critical discussion. *Neuroscience* 146:1435–1444.
- 1299 Schölvinck ML, Saleem AB, Benucci A, Harris KD, Carandini M (2015) Cortical state  
1300 determines global variability and correlations in visual cortex. *The Journal of*  
1301 *Neuroscience* 35:170–178.
- 1302 Senn S (2006) Change from baseline and analysis of covariance revisited. *Statist Med*  
1303 25:4334–4344.
- 1304 Shah AS, Bressler SL, Knuth KH, Ding M, Mehta AD, Ulbert I, Schroeder CE (2004) Neural  
1305 Dynamics and the Fundamental Mechanisms of Event-related Brain Potentials.  
1306 *Cerebral Cortex* 14:476–483.
- 1307 Shimaoka D, Harris KD, Carandini M (2018) Effects of Arousal on Mouse Sensory Cortex  
1308 Depend on Modality. *Cell Reports* 22:3160–3167.
- 1309 Sitaram R, Ros T, Stoeckel LE, Haller S, Scharnowski F, Lewis-Peacock J, Weiskopf N,  
1310 Blefari M, Rana M, Oblak E, Birbaumer N, Sulzer J (2016) Closed-loop brain  
1311 training: the science of neurofeedback. *Nature Neuroscience*.
- 1312 Speed A, Del Rosario J, Burgess CP, Haider B (2019) Cortical State Fluctuations across  
1313 Layers of V1 during Visual Spatial Perception. *Cell Reports* 26:2868–2874.e3.

- 1314 Tallon-Baudry C, Bertrand O (1999) Oscillatory gamma activity in humans and its role in  
1315 object representation. *Trends in Cognitive Sciences* 3:12.
- 1316 Tallon-Baudry C, Bertrand O, Delpuech C, Pernier J (1996) Stimulus Specificity of Phase-  
1317 Locked and Non-Phase-Locked 40 Hz Visual Responses in Human. *J Neurosci*  
1318 16:4240–4249.
- 1319 Tiitinen HT, Sinkkonen J, Reinikainen K, Alho K, Lavikainen J, Näätänen R (1993)  
1320 Selective attention enhances the auditory 40-Hz transient response in humans.  
1321 *Nature* 364:59–60.
- 1322 Tune S, Wöstmann M, Obleser J (2018) Probing the limits of alpha power lateralisation  
1323 as a neural marker of selective attention in middle-aged and older listeners.  
1324 *European Journal of Neuroscience* 48:2537–2550.
- 1325 van den Brink RL, Murphy PR, Nieuwenhuis S (2016) Pupil Diameter Tracks Lapses of  
1326 Attention Mishra RK, ed. *PLoS ONE* 11:e0165274.
- 1327 Vinck M, Batista-Brito R, Knoblich U, Cardin JA (2015) Arousal and Locomotion Make  
1328 Distinct Contributions to Cortical Activity Patterns and Visual Encoding.  
1329 *Neuron* 86:740–754.
- 1330 Voigt MB, Yusuf PA, Kral A (2018) Intracortical Microstimulation Modulates Cortical  
1331 Induced Responses. *The Journal of Neuroscience* 38:7774–7786.
- 1332 Wang C-A, Boehnke SE, White BJ, Munoz DP (2012) Microstimulation of the Monkey  
1333 Superior Colliculus Induces Pupil Dilation Without Evoking Saccades. *Journal*  
1334 *of Neuroscience* 32:3629–3636.
- 1335 Waschke L, Wöstmann M, Obleser J (2017) States and traits of neural irregularity in the  
1336 age-varying human brain. *Scientific Reports* 7:17381.
- 1337 Wöstmann M, Waschke L, Obleser J (2018) Prestimulus neural alpha power predicts  
1338 confidence in discriminating identical auditory stimuli. *European Journal of*  
1339 *Neuroscience*:285577.
- 1340 Yerkes RM, Dodson JD (1908) The relation of strength of stimulus to rapidity of habit-  
1341 formation. *Journal of Comparative Neurology and Psychology* 18:459–482.
- 1342 Zagha E, Casale AE, Sachdev RNS, McGinley MJ, McCormick DA (2013) Motor Cortex  
1343 Feedback Influences Sensory Processing by Modulating Network State. *Neuron*  
1344 79:567–578.
- 1345 Zagha E, McCormick DA (2014) Neural control of brain state. *Current Opinion in*  
1346 *Neurobiology* 29:178–186.
- 1347
- 1348
